# Supplementary material for: FMN reduces Amyloid-β toxicity in yeast by regulating redox status and cellular metabolism
Source: PubMed Central journal article supplement (PMC7018843; doi:10.1038/s41467-020-14525-4), 2020-02-13
Supplement: 41467_2020_14525_MOESM1_ESM.pdf [file 41467_2020_14525_MOESM1_ESM.pdf]

1

2

3

4

## Supplementary Information

5

6

7

**FMN reduces Amyloid- $\beta$  toxicity in yeast by regulating**

8

**redox status and cellular metabolism**

9

10

11

12

Chen *et al.*

13

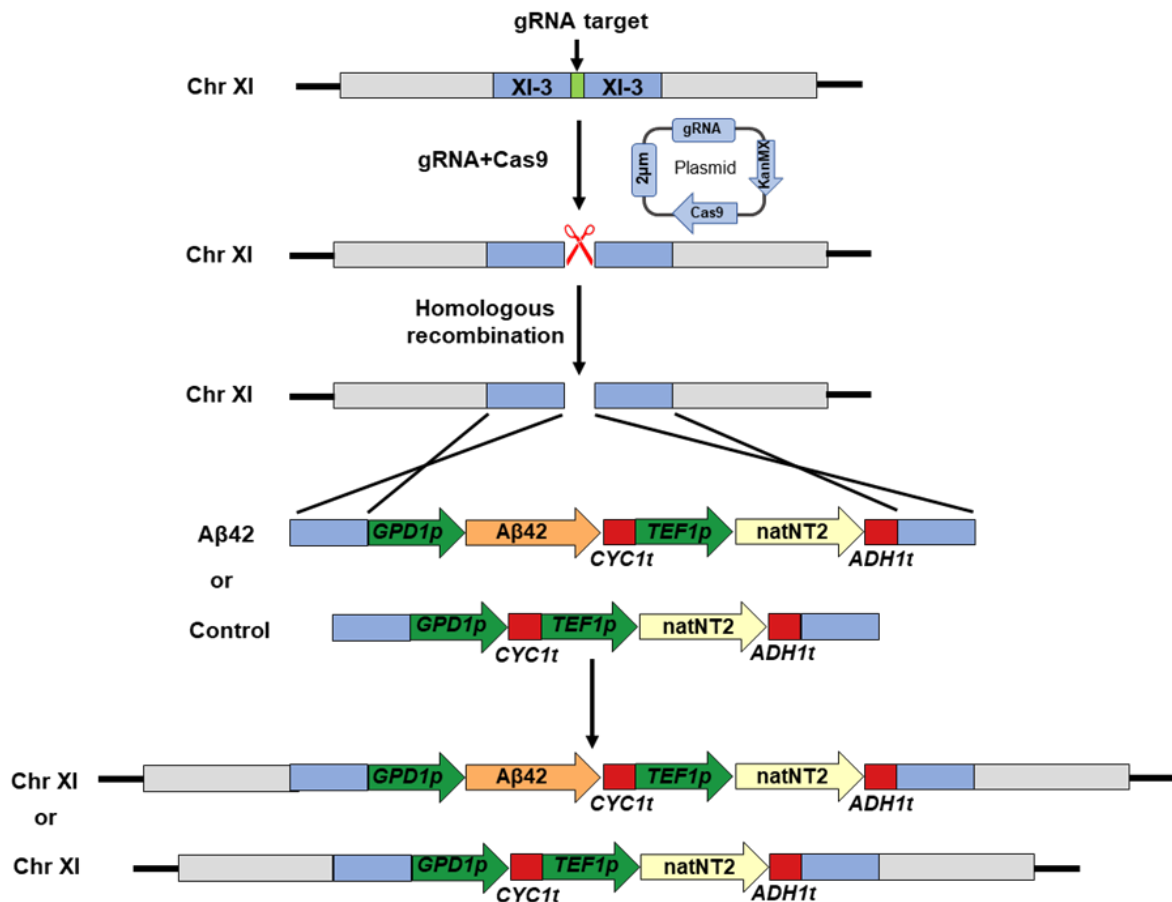

14

15

16 **Supplementary Figure 1.** The schematic diagram of SGA query strain construction. The first  
 17 copy of Aβ42 gene under the control of *GPD1* promoter and *CYC1* terminator is integrated  
 18 into chromosome XI of the yeast strain, Y7092. The all-in-one plasmids containing Cas9  
 19 nuclease and site-specific guide RNA are used for genome integration. The second copy of  
 20 Aβ42 gene is integrated into chromosome XII (not shown). The control strain was constructed  
 21 at the same chromosome sites with only promoter and terminator sequences. NatNT2  
 22 encodes clonNat protein as a selection marker.

23

24

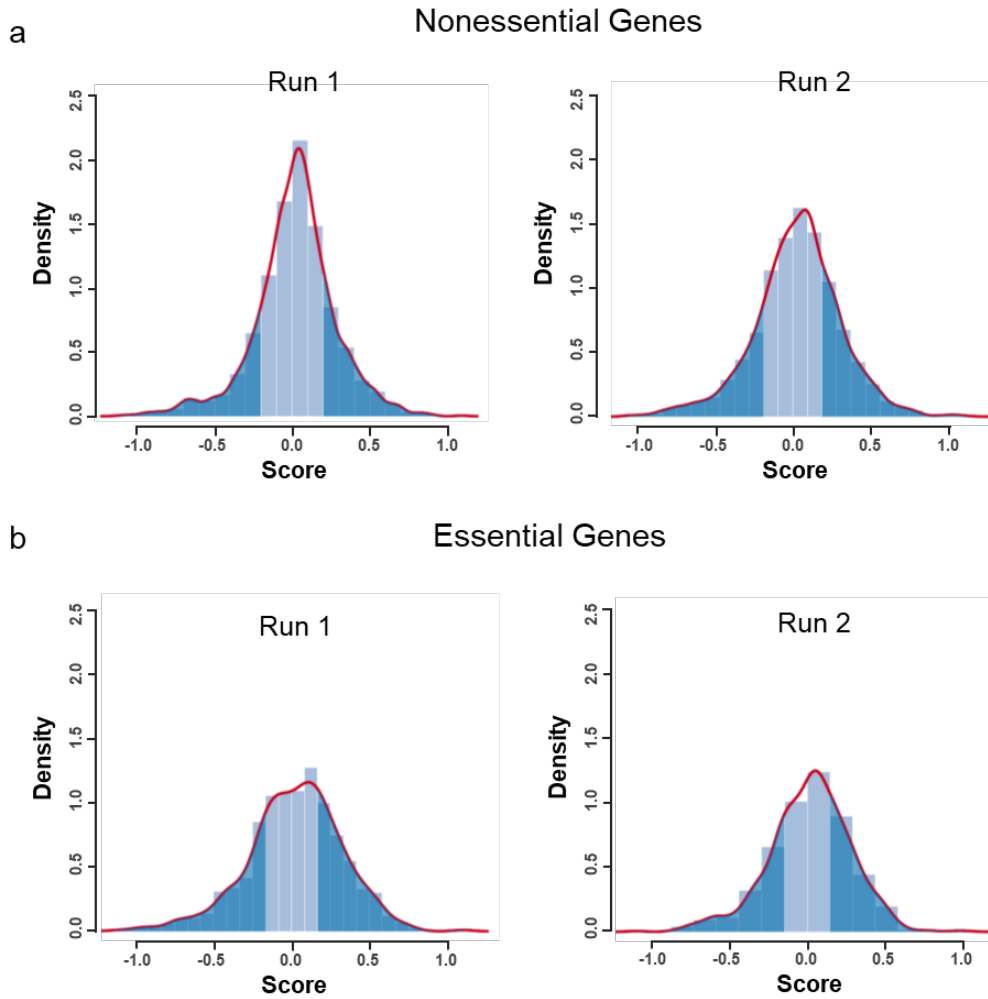

25

26

27 **Supplementary Figure 2.** The distribution of significantly changed SGA scores from the  
 28 nonessential (a) and essential mutant collections (b) ( $p\text{-adj} < 0.05$ ). Dark blue indicates the  
 29 threshold set for the scores (score  $\geq 0.2$  or score  $\leq -0.2$ ).

30

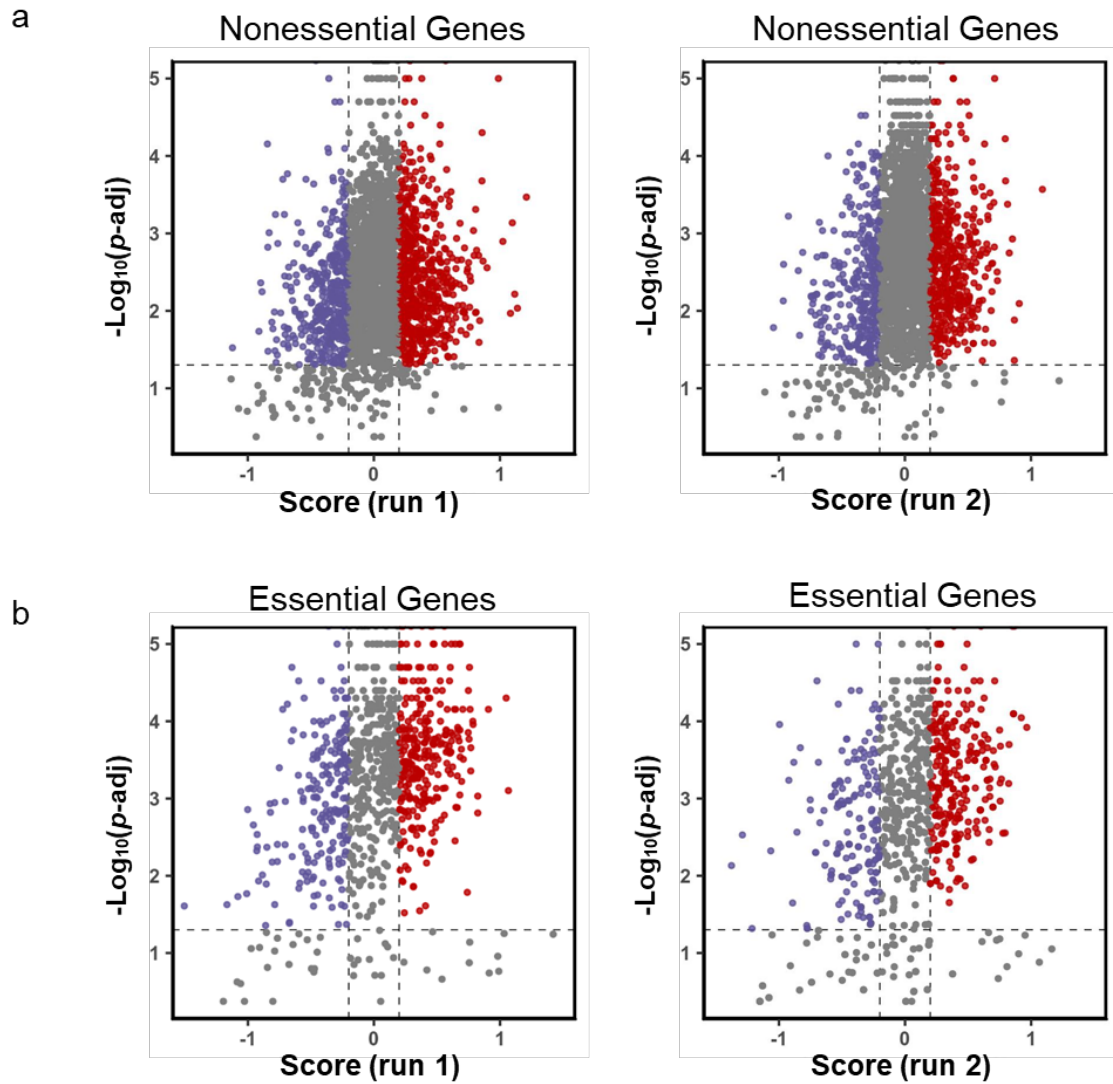

31

32

33 **Supplementary Figure 3.** Volcano plot of significantly changed SGA scores from the  
 34 nonessential (a) and essential mutant collections (b). The SGA scores and corresponding  
 35 significance values are shown on the X- and Y-axis, respectively. The mutants with  
 36 significantly reduced A $\beta$ 42 toxicity (score  $\geq 0.2$ ,  $p$ -adj  $< 0.05$ ) and significantly increased A $\beta$ 42  
 37 toxicity (score  $\leq -0.2$ ,  $p$ -adj  $< 0.05$ ) are highlighted in red and blue, respectively. Adjusted  $p$   
 38 values ( $p$ -adj) are calculated using the Benjamini-Hochberg procedure.

39

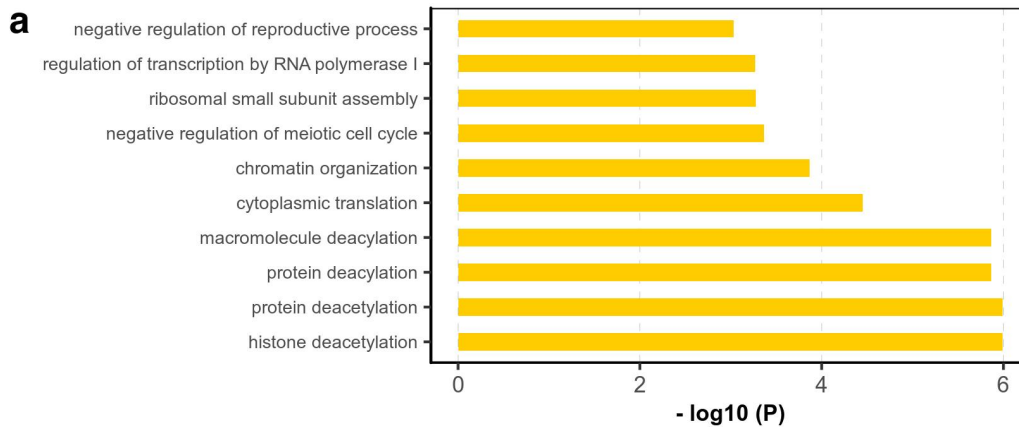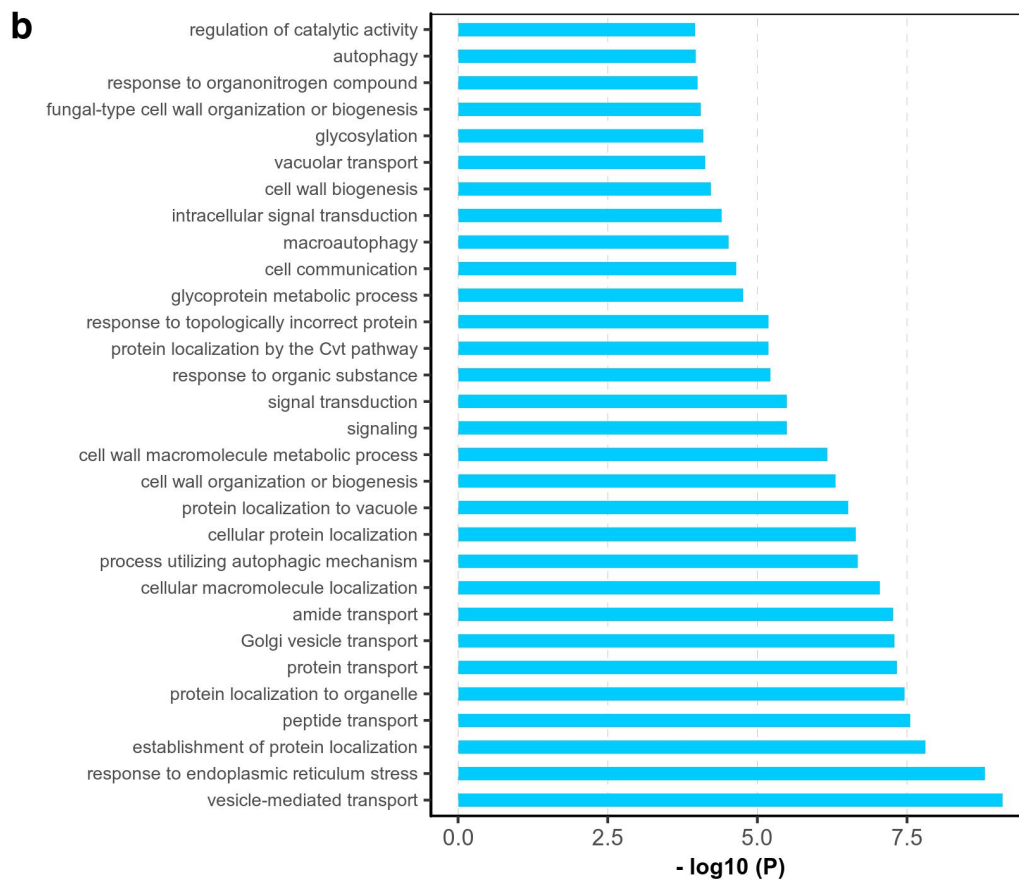

40

41 **Supplementary Figure 4.** Gene set enrichment analysis (GSEA) of mutants from the  
 42 nonessential mutant collection with (a) significantly reduced A $\beta$ 42 toxicity (score  $\geq 0.2$ ,  $p$ -adj  
 43  $< 0.05$ ) and (b) significantly increased A $\beta$ 42 toxicity (score  $\leq -0.2$ ,  $p$ -adj  $< 0.05$ ). GO terms  
 44 are ranked according to the significance and top 30 terms are listed in the figure.

45

46

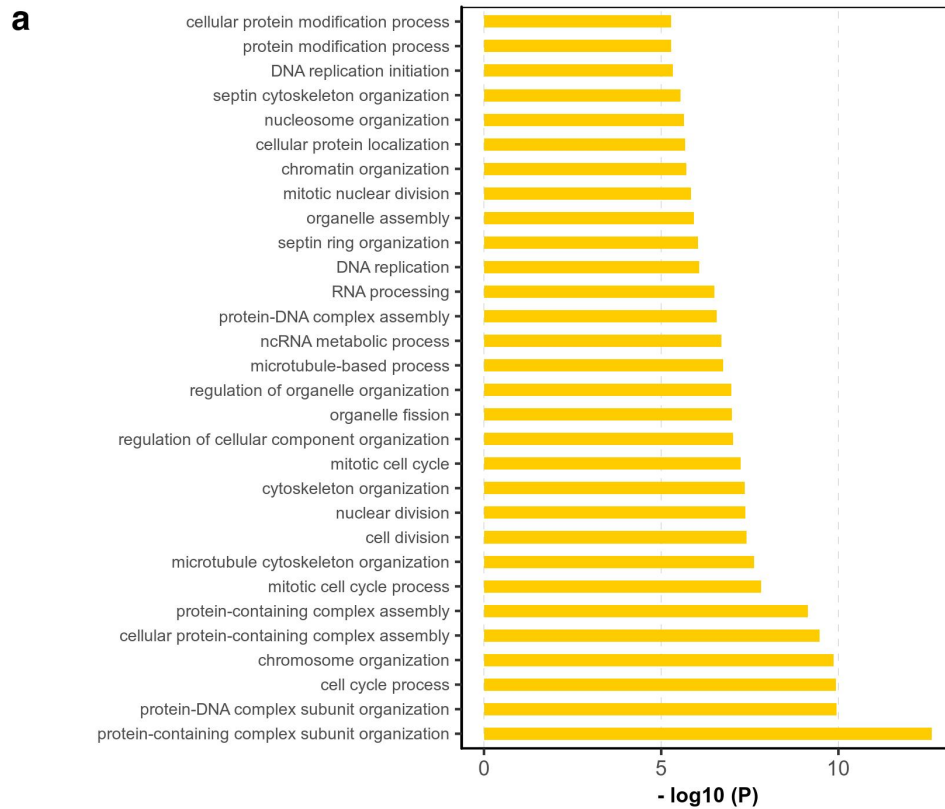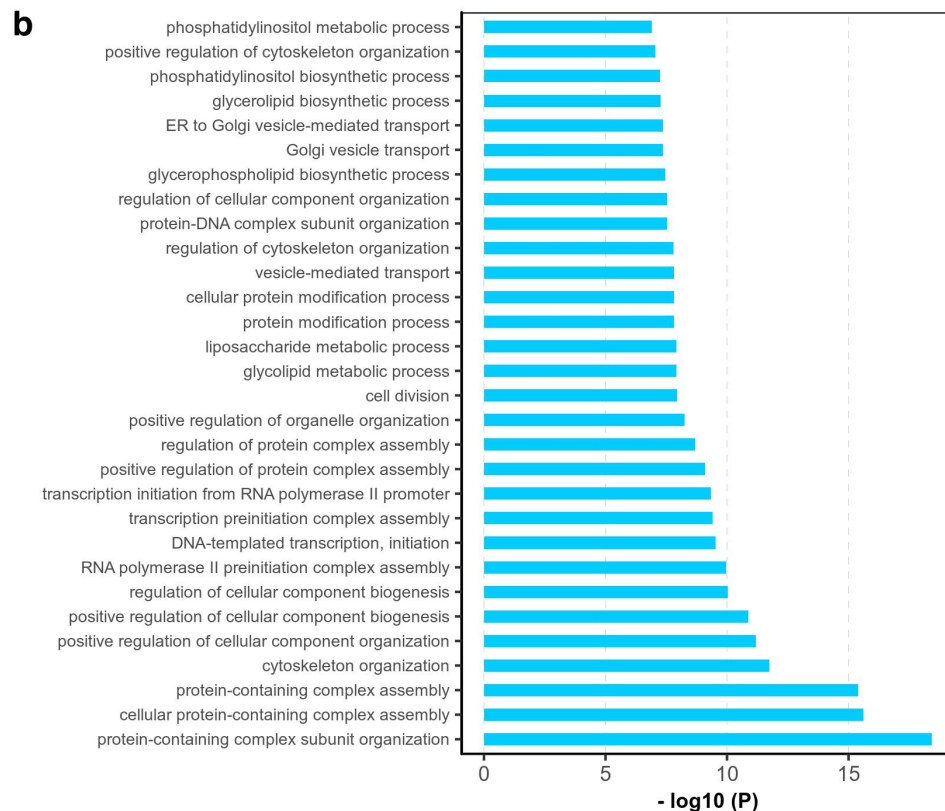

47

48 **Supplementary Figure 5.** Gene set enrichment analysis (GSEA) of mutants from the  
 49 essential mutant collection with (a) significantly reduced A $\beta$ 42 toxicity (score  $\geq 0.2$ ,  $p$ -adj <  
 50 0.05) and (b) significantly increased A $\beta$ 42 toxicity (score  $\leq -0.2$ ,  $p$ -adj < 0.05). GO terms are  
 51 ranked according to the significance and top 30 terms are listed in the figure.

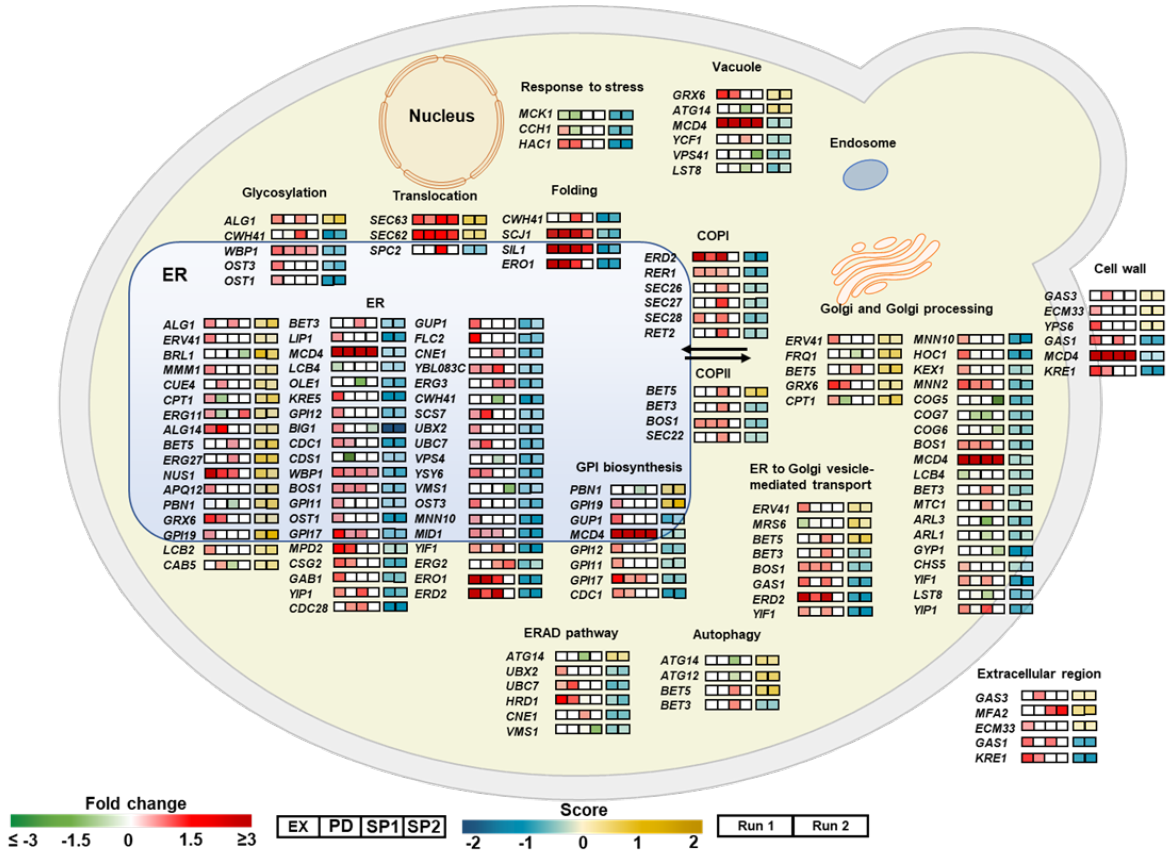

53

54

55 **Supplementary Figure 6.** The correlation between transcriptome and SGA data in protein  
 56 secretion and degradation processes. Transcriptome data (in red and green) are shown as  
 57 fold changes of gene expression between the A $\beta$ 42 expression strain and the control strain  
 58 (carrying an empty vector) during EX, PD, SP1 (early stationary phase when extracellular  
 59 carbon source was depleted) and SP2 (later stationary phase, 2 days after SP1) (Chen *et al.*  
 60 2017). SGA data (in blue and yellow) are shown as a score by comparing mutants with A $\beta$ 42  
 61 expression to mutants with the control from two independent screen (present study).

62

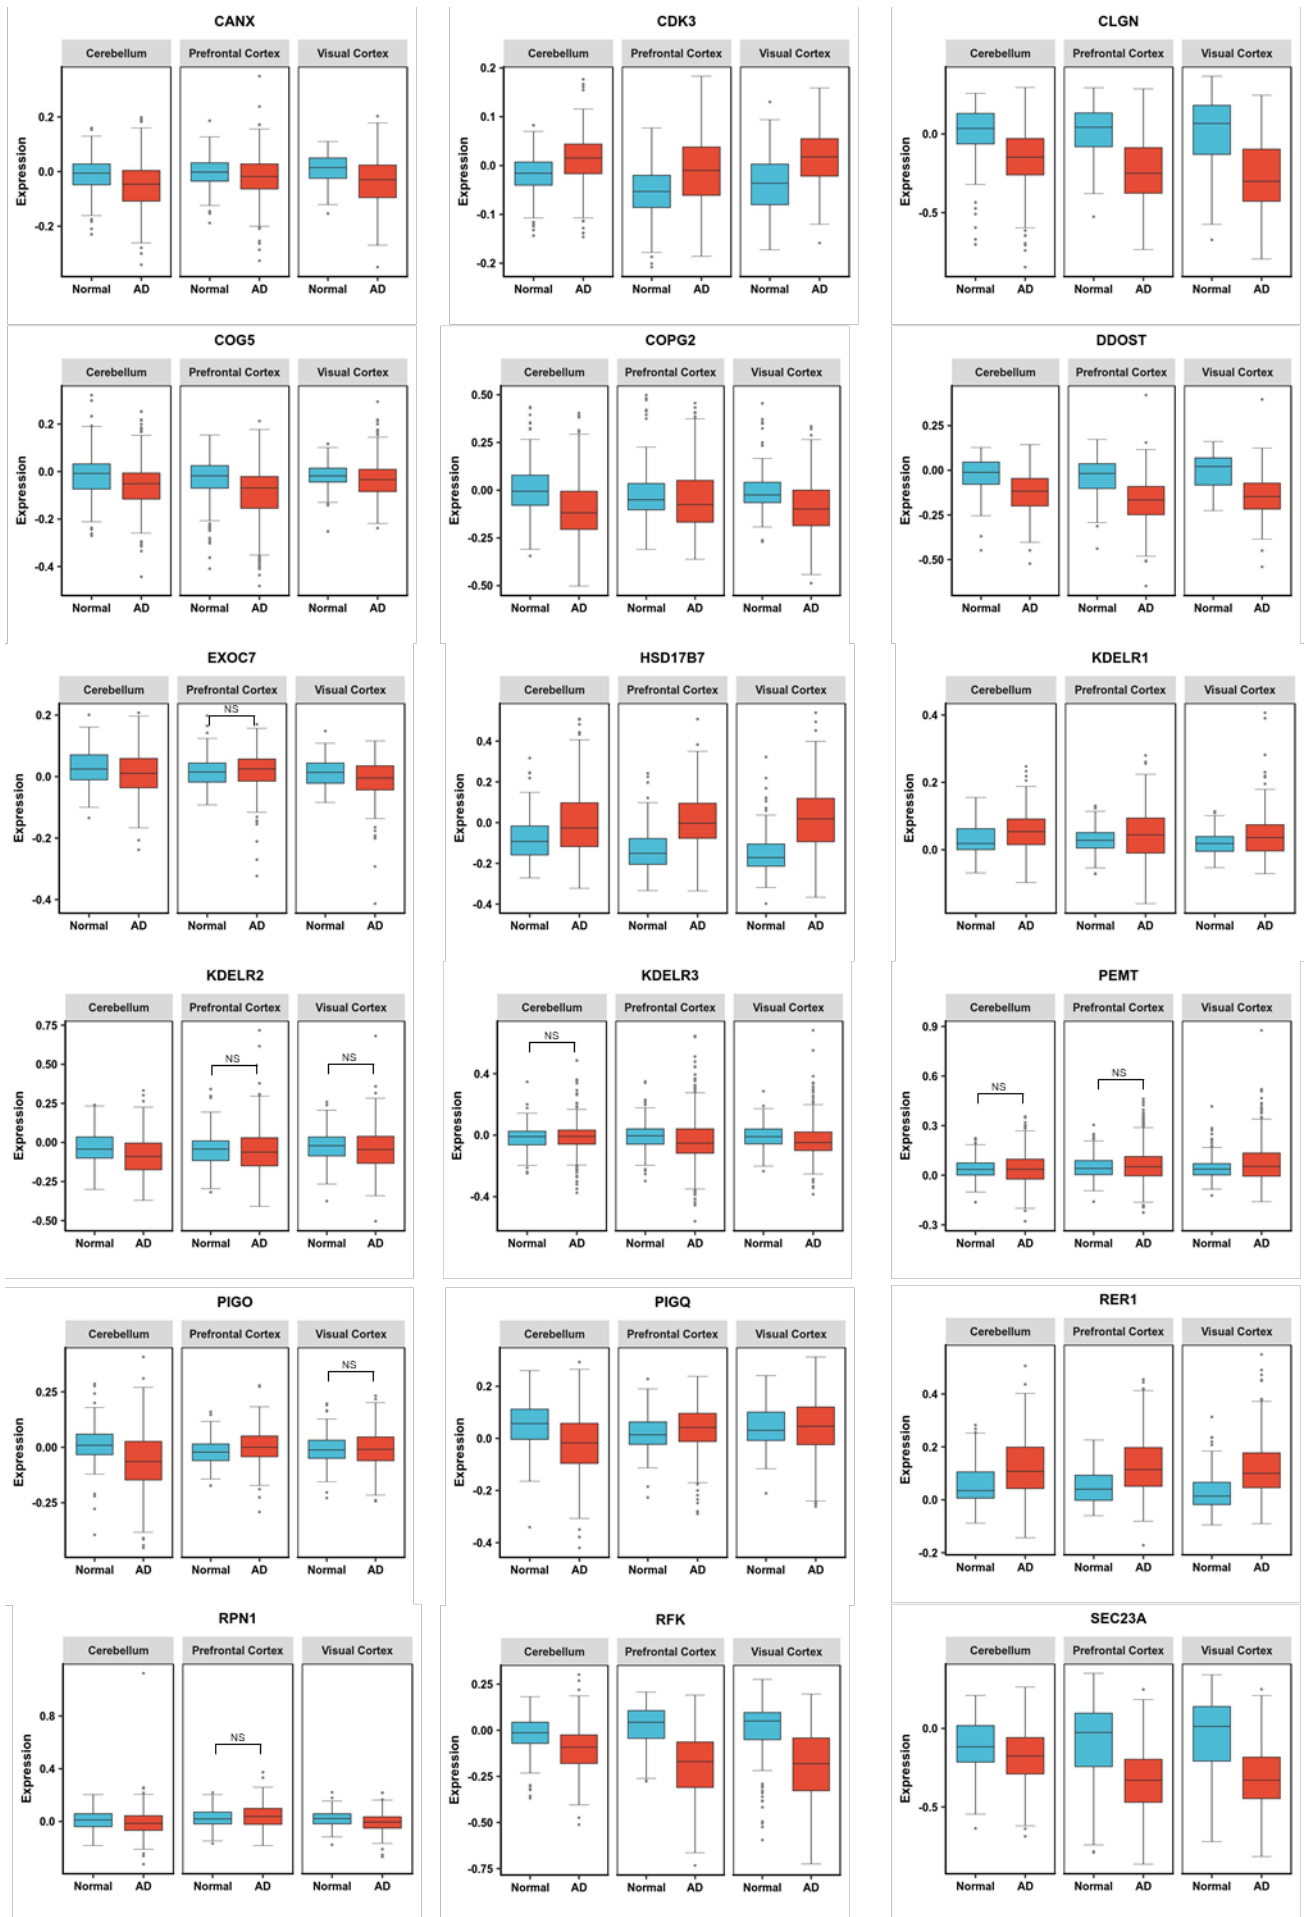



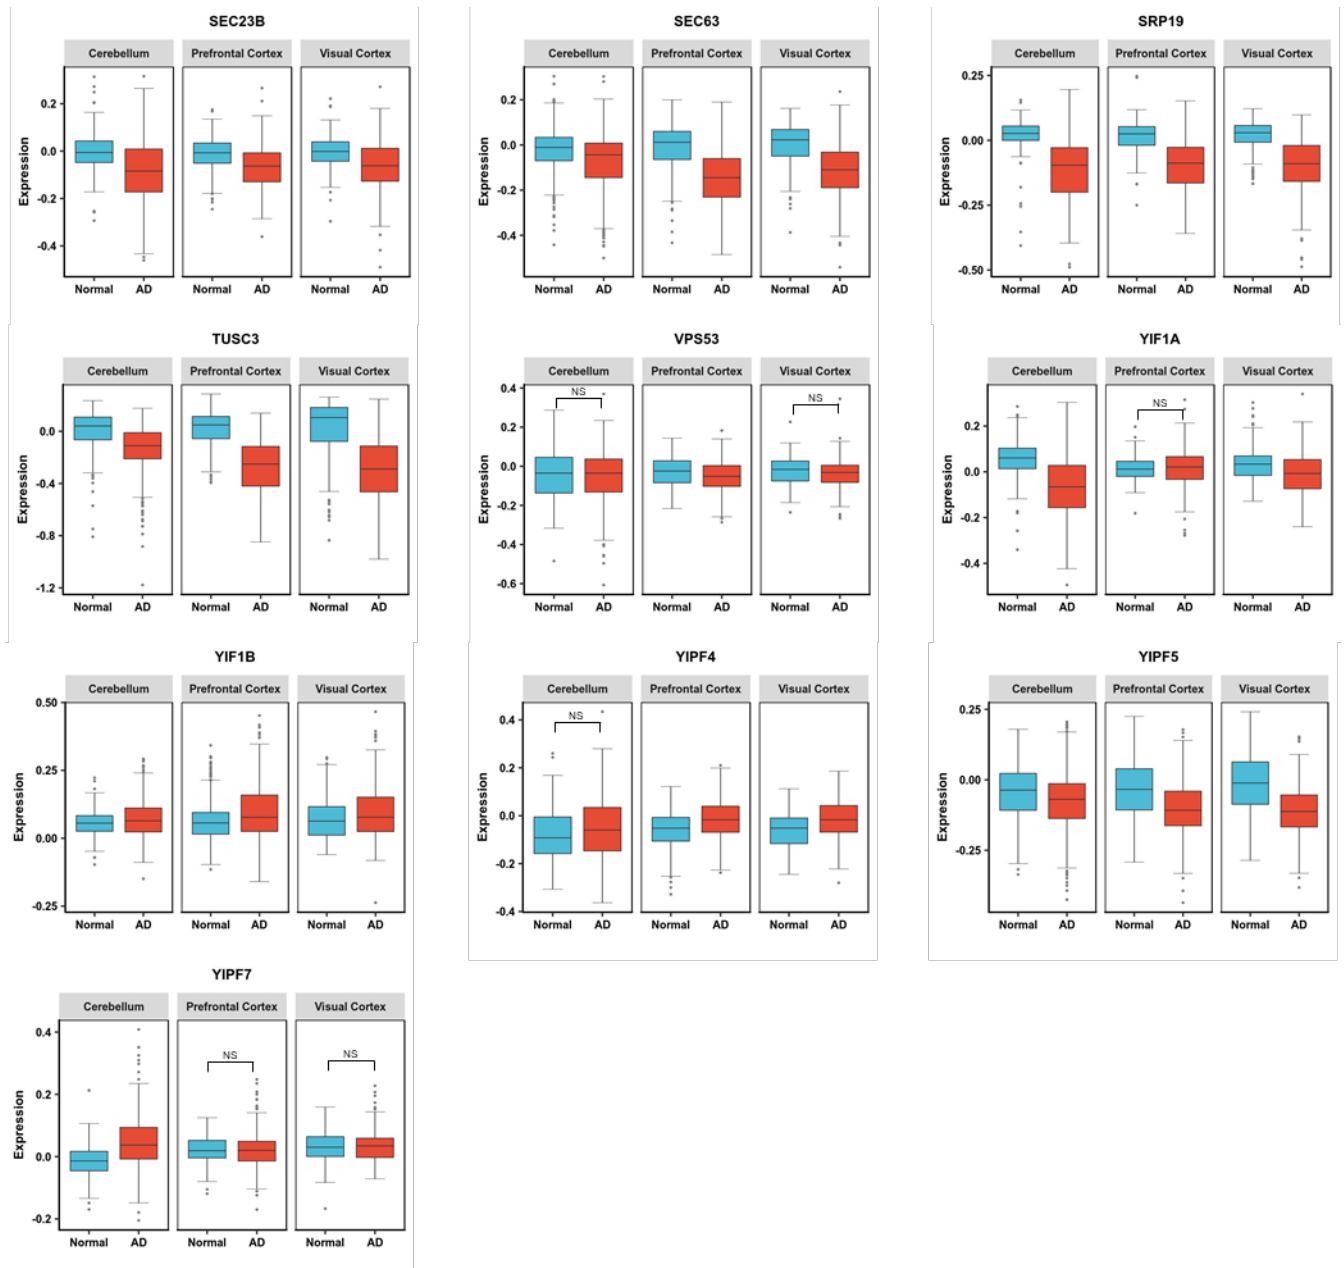

64

65 **Supplementary Figure 7.** The mRNA expression levels of 28 human orthologs in the  
 66 cerebellum, prefrontal cortex and visual cortex of AD patients versus normal controls. NS  
 67 indicates no significant difference ( $p\text{-adj} > 0.05$ ) between AD patients and normal controls,  
 68 whereas the remaining comparisons (without labeling) indicate significant difference ( $p\text{-adj} <$   
 69 0.05).

70

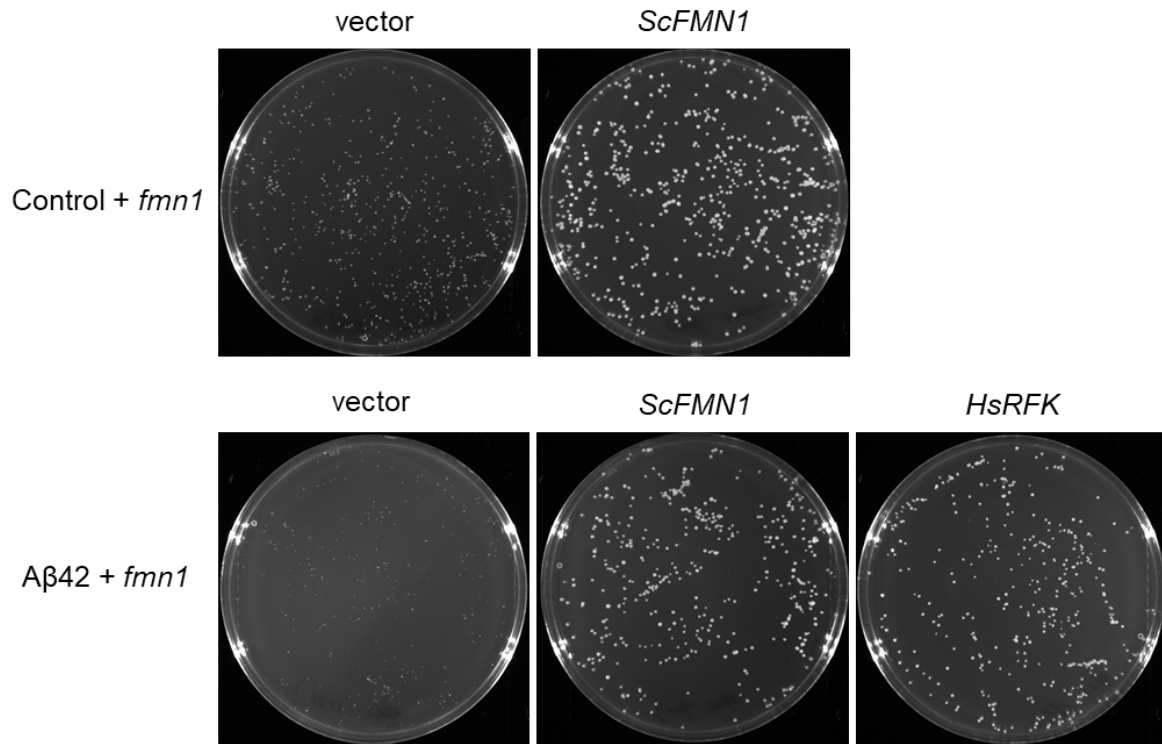

71

72 **Supplementary Figure 8.** Complementation assays of the *fmn1* mutant (in control or A $\beta$ 42  
 73 expressing strains) with either yeast (*Sc*) *FMN1* or human (*Hs*) homologues *RFK*  
 74 expression. Cells are harvested at mid exponential phase ( $OD_{600nm} \approx 0.5-0.6$ ) and 400 cells  
 75 are plated on selective plates. Vector: MoBY empty plasmid; *ScFMN1*: pFMN1-MoBY  
 76 plasmid; *HsRFK*: P416 GPD-human RFK plasmid.

77

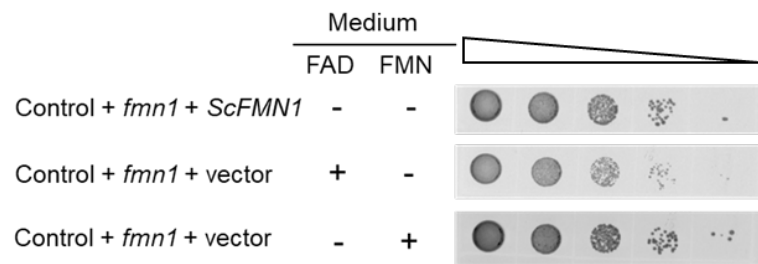

78

79

80 **Supplementary Figure 9.** 10-fold serial dilutions of the control strain with *fmn1* mutant  
81 expressing indicated constructs with the supplementation of 5 mM FAD or 5 mM FMN in the  
82 medium.

83

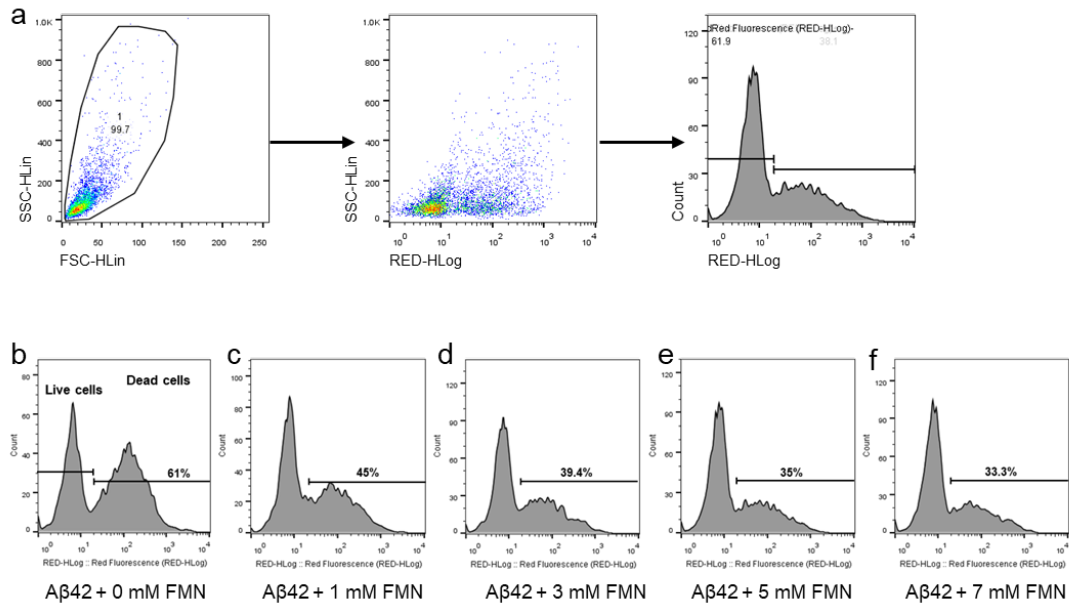

84

85 **Supplementary Figure 10.** Flowcytometry measurement of propidium iodide (PI) staining in  
 86 the Aβ42 strain at day 5. (a) Gating strategy to detect live cells and dead cells. Aβ42 strain  
 87 was treated without FMN (b), or with 1 mM FMN (c), 3 mM FMN (d), 5 mM FMN (e) and 7 mM  
 88 FMN (f), respectively. The percentages of dead cells are annotated in the figure. Values shown  
 89 are averages ± SD of biological triplicates. The same gating strategy was applied to all FACS  
 90 results in this paper. Source data are provided as a Source Data file.

91

92

93

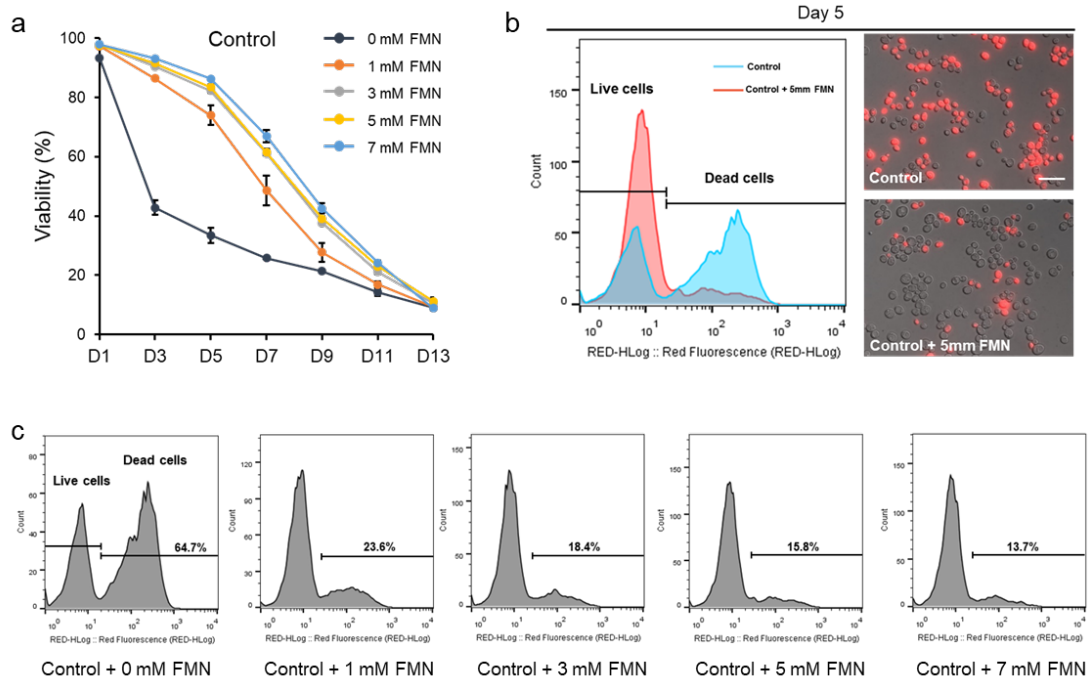

94

95

96 **Supplementary Figure 11.** Viability of control strain without or with different concentrations  
 97 of FMN supplementation. (a) Viability was measured by PI staining following chronological  
 98 aging. (b) Flowcytometry and fluorescence micrographs of PI staining on day 5. Dead cells  
 99 are stained in red. Scale = 10  $\mu$ m. (c-g) Flowcytometry measurement of PI staining in control  
 100 strain at day 5. Cells was treated without FMN (c), or with 1 mM FMN (d), 3 mM FMN (e), 5  
 101 mM FMN (f) and 7 mM FMN (g), respectively. The percentages of dead cells are indicated in  
 102 the figure. Values shown are averages  $\pm$  SD of biological triplicates. Source data are provided  
 103 as a Source Data file.

104

105

106

107

108

109

110

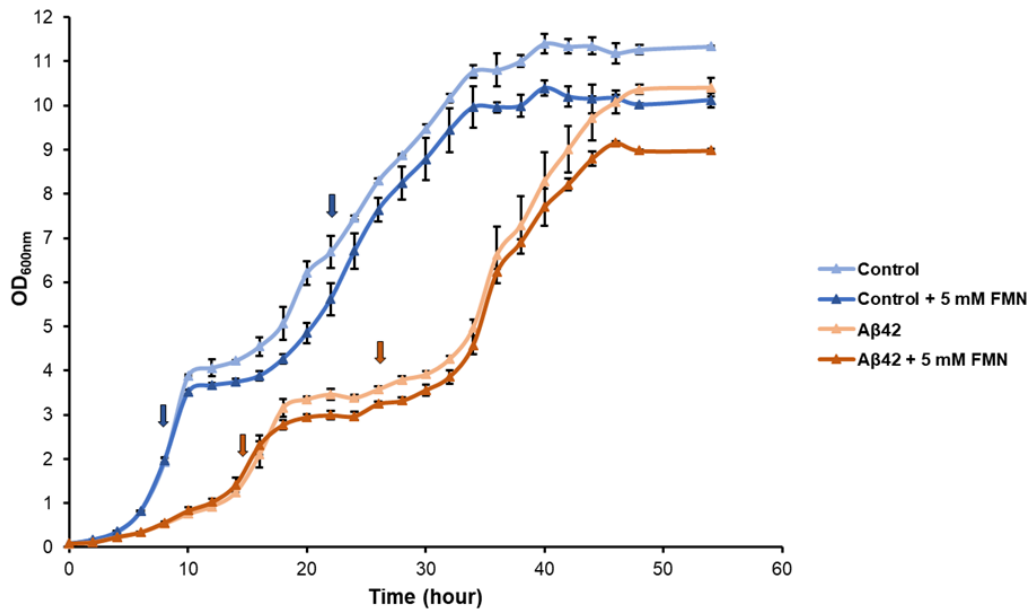

111

112

113 **Supplementary Figure 12.** Growth curve of control and Aβ42 strains without or with 5 mM  
 114 FMN supplementation. Arrows indicate the sampling time points for NADPH/(NADPH+NADP<sup>+</sup>)  
 115 and NADH/(NADH+NAD<sup>+</sup>) measurements during EX and PD growth phases. Arrows during  
 116 EX growth phase also indicate the sampling time point for RNA-seq analysis. Values shown  
 117 are averages ± SD of biological triplicates.

118

119

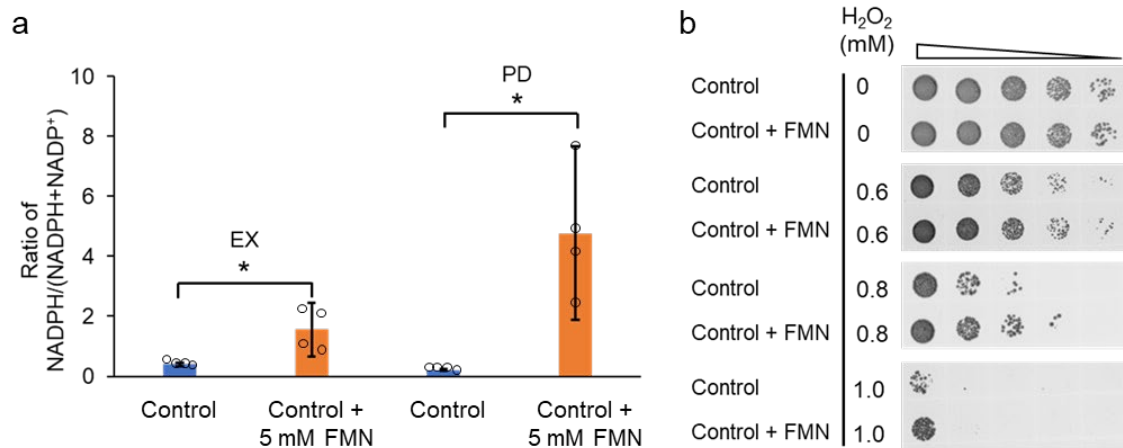

120

121

122 **Supplementary Figure 13.** FMN improves cellular tolerance to oxidative stress in the control  
 123 strain. (a) The ratio of NADPH/(NADPH+NADP<sup>+</sup>) in control strain without or with FMN  
 124 supplementation. Results are presented as average values ± SD of biological quadruplicates.  
 125 \* =  $p < 0.05$ . (b) 5-fold serial dilutions of control strain without or with 5 mM FMN  
 126 supplementation on plates containing 0.6 mM, 0.8 mM and 1.0 mM of H<sub>2</sub>O<sub>2</sub>, respectively.  
 127 Source data are provided as a Source Data file.

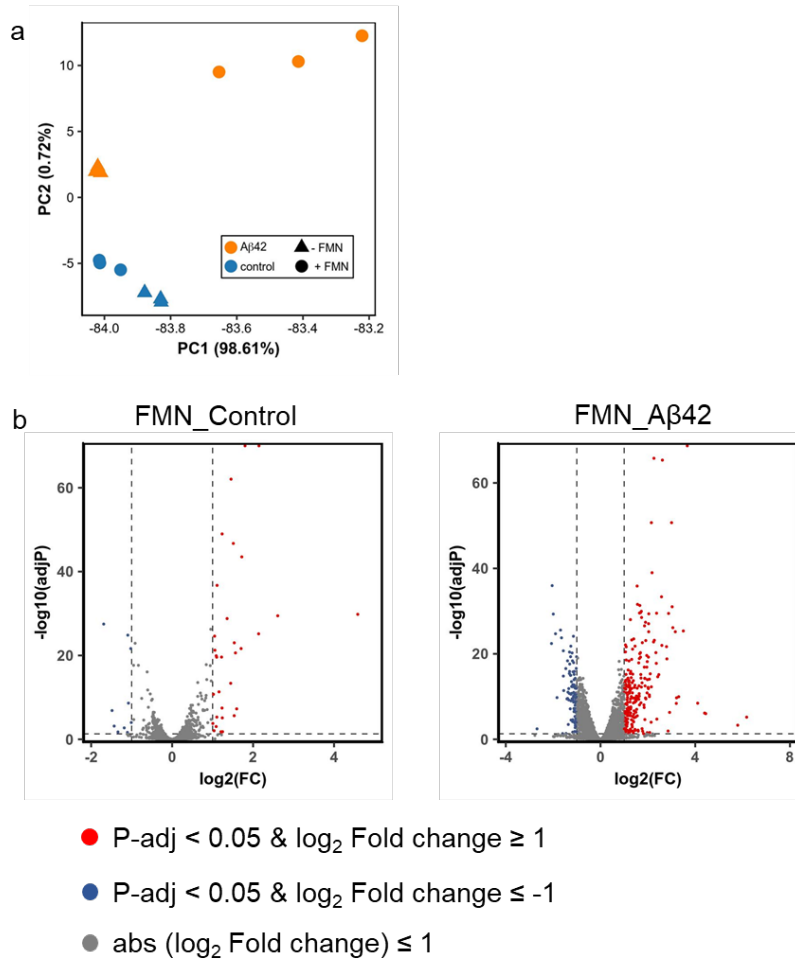

128  
129

130 **Supplementary Figure 14.** The global transcriptional response to FMN supplementation in  
131 both the control and A $\beta$ 42 strains. (a) Principle Component Analysis (PCA) of the normalized  
132 RNAseq data. Samples were taken from biological triplicate cultures. (b) Volcano plot of log<sub>2</sub>  
133 Fold change vs adjusted  $p$  value of differentially expressed genes comparing with FMN and  
134 without FMN supplementation in the control strain (left panel, FMN\_Control) and A $\beta$ 42 strain  
135 (right panel, FMN\_A $\beta$ 42). The dashed vertical grey line indicates the threshold of log<sub>2</sub>(Fold  
136 change) ( $\leq$  -1 or  $\geq$  1), while the horizontal grey line indicates statistical significance threshold  
137 of adjusted  $p$  value < 0.05.

138  
139



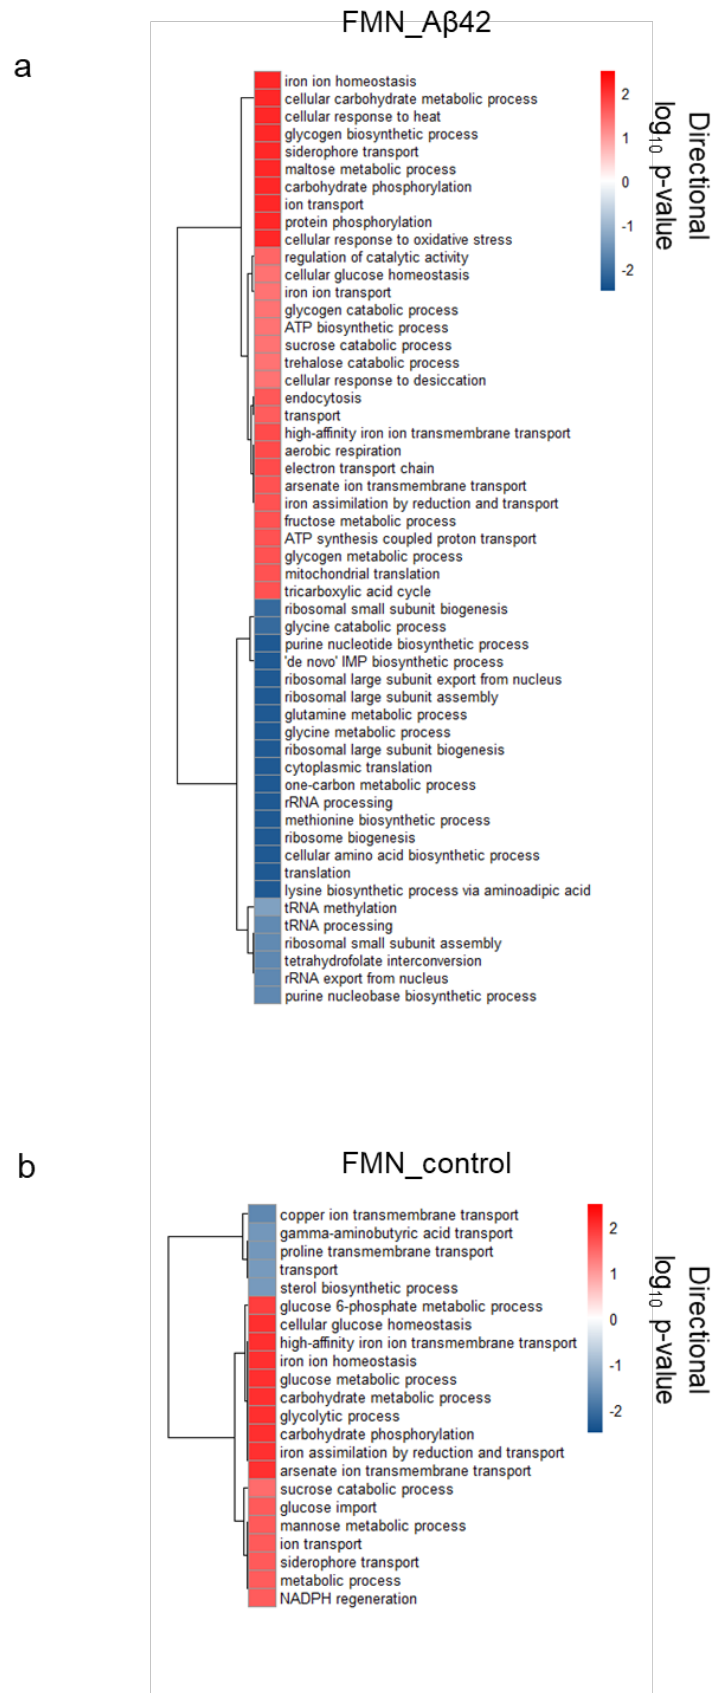

140

141

142

143

**Supplementary Figure 15.** GO enrichment analysis. Significantly enriched GO terms in Aβ42 strain (a) and control strain (b) with or without FMN supplementation. Up-regulated processes (red) and down-regulated processes (blue) are presented by their significance.

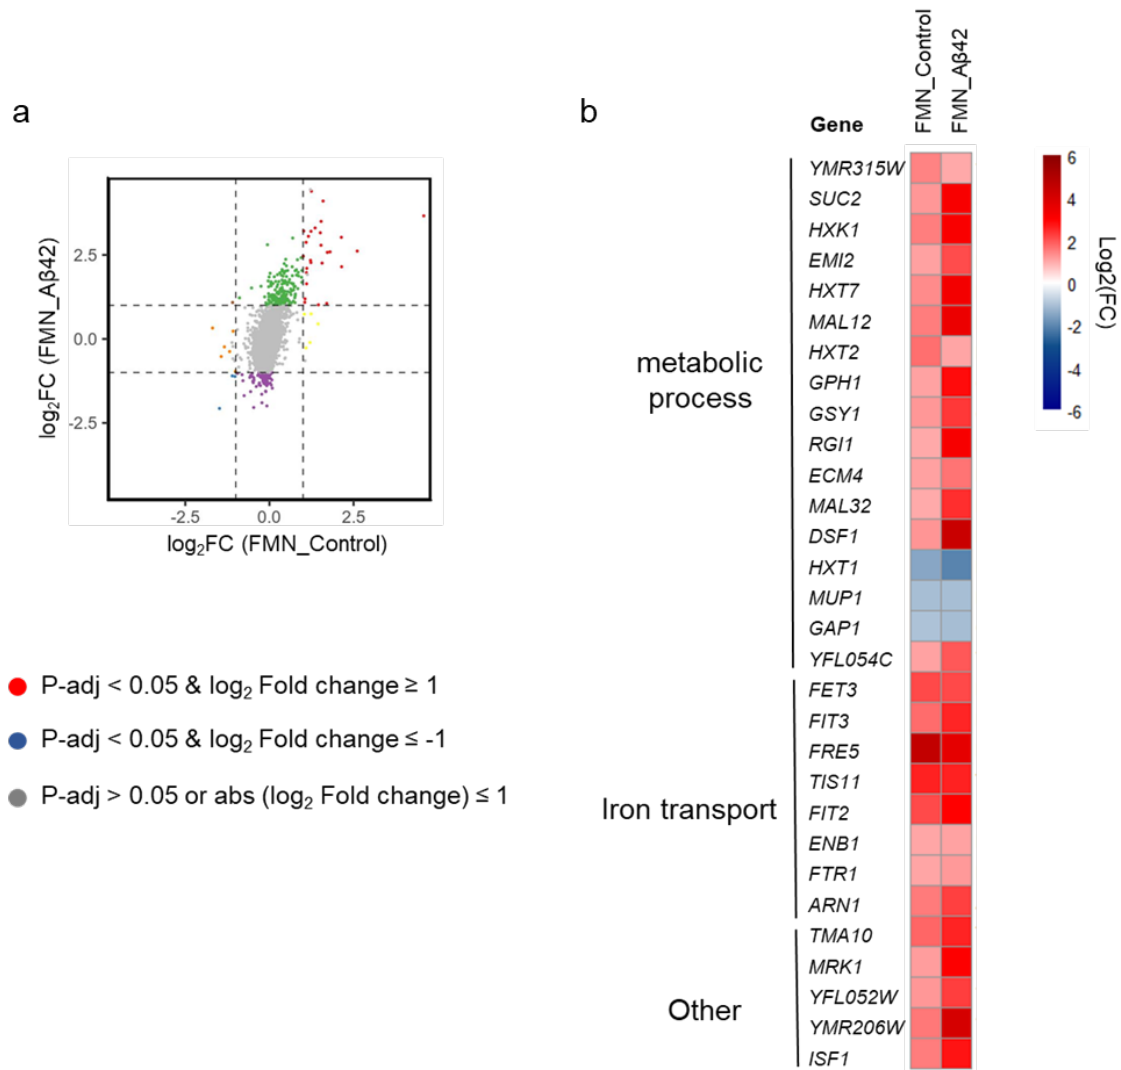

144  
 145  
 146  
 147  
 148  
 149  
 150  
 151  
 152  
 153

**Supplementary Figure 16.** Summary of the differentially expressed genes in the control and Aβ42 strains with or without FMN supplementation. (a) X axis represents the log<sub>2</sub> of fold change (FC) in the control strain with FMN supplementation versus without (FMN\_control), while the Y axis represents the log<sub>2</sub> of Fold change (FC) in the Aβ42 strain with FMN supplementation versus without (FMN\_Aβ42). The highlighted points indicate genes with significantly increased (log<sub>2</sub>FC ≥ 1, red) or decreased (log<sub>2</sub>FC ≤ -1, blue) expression, respectively (p-adj < 0.05). (b) The differentially expressed genes (red and blue points from a) are mostly related to metabolic process and iron transport.

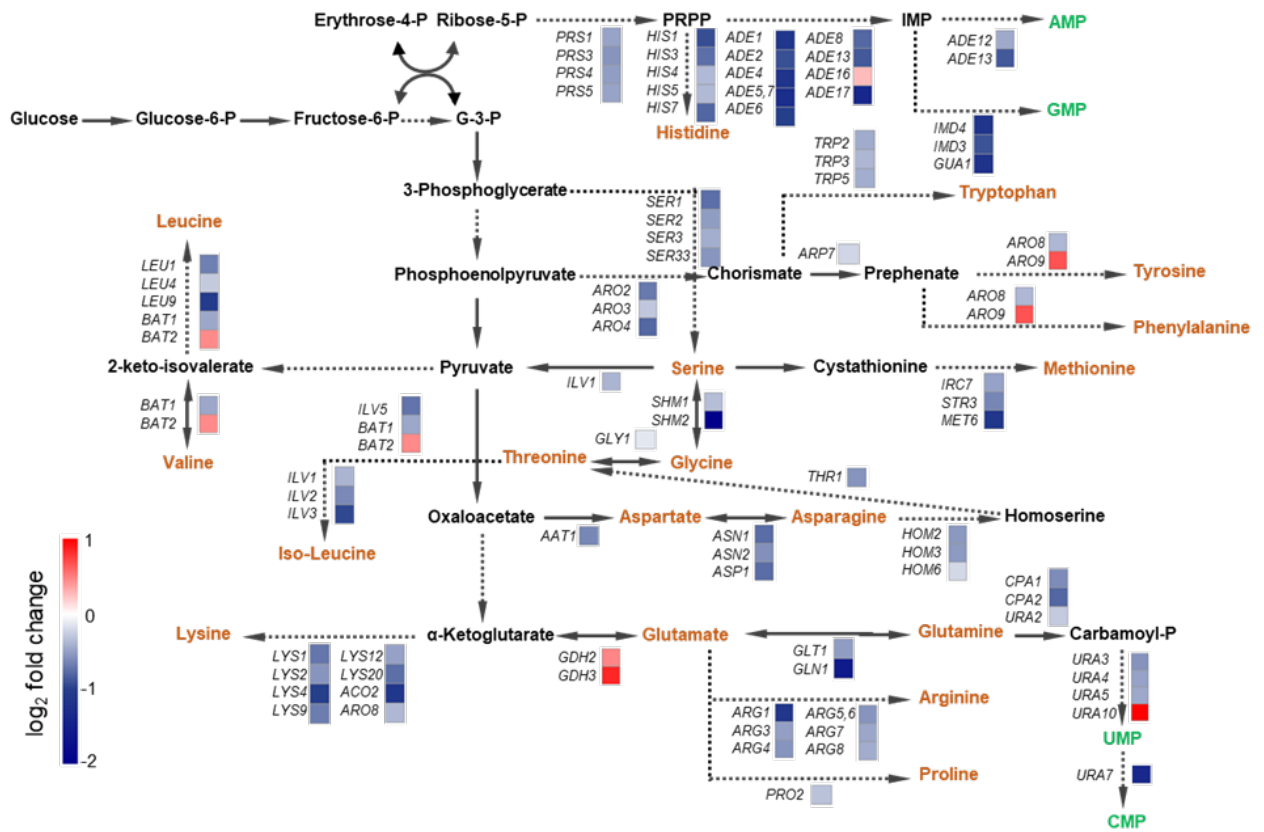

154

155 **Supplementary Figure 17.** Schematic overview of significantly changed genes in amino acid  
 156 biosynthesis in the Aβ42 strain with or without FMN supplementation ( $p\text{-adj} < 0.05$ ).

157

158

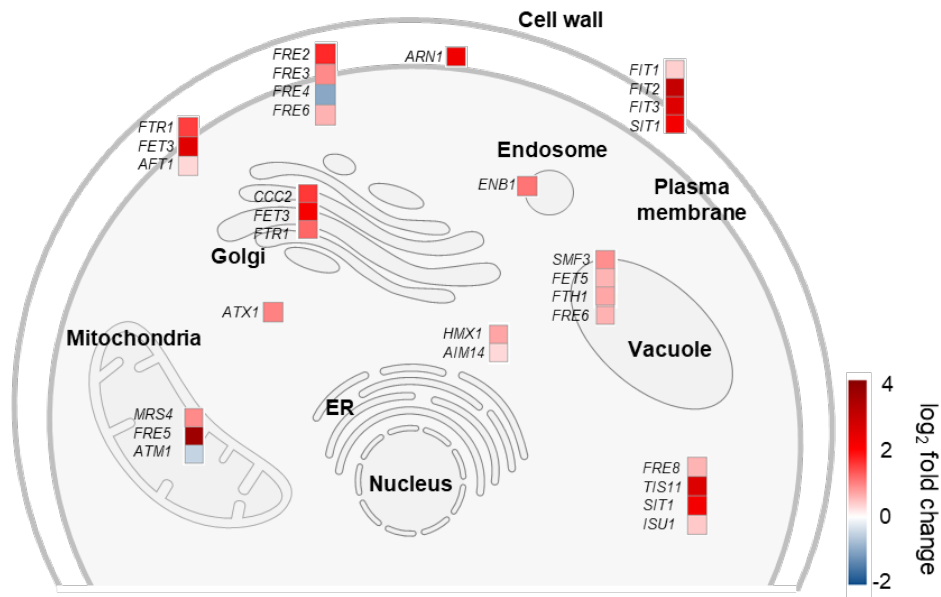

159

160 **Supplementary Figure 18.** Transcriptional changes of genes related to iron transport and  
 161 iron homeostasis processes in Aβ42 strain with or without FMN supplementation ( $p$ -adj < 0.05).

162

163

164

165

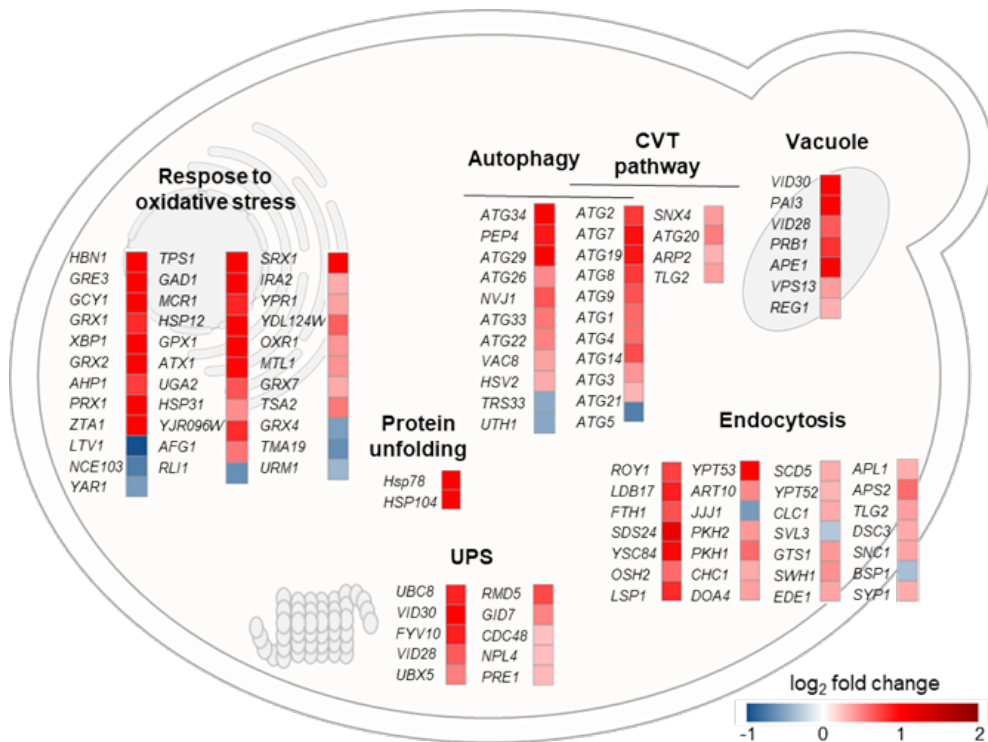

166

167

168 **Supplementary Figure 19.** Transcriptional changes of genes related to the oxidative stress  
 169 response and protein metabolic processes in the A $\beta$ 42 strain with or without FMN  
 170 supplementation ( $p$ -adj < 0.05).

171

172

173

174

175

176

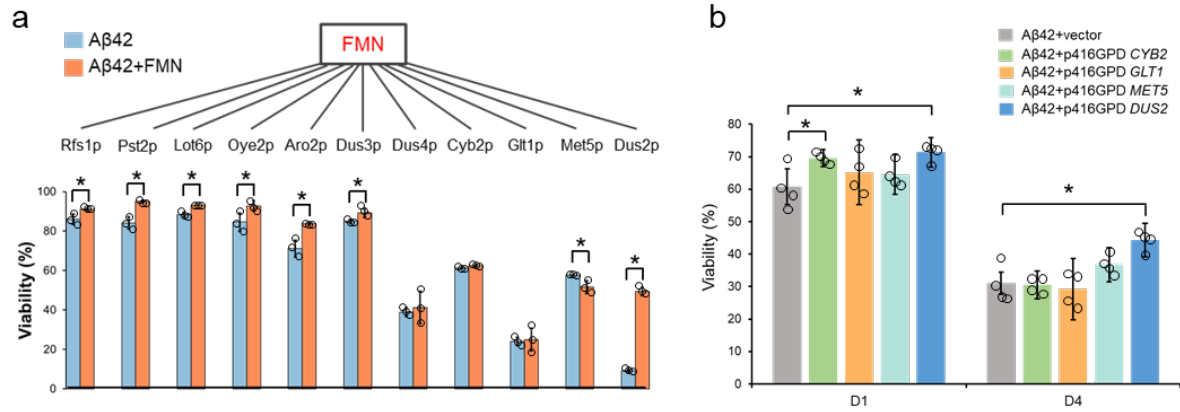

177

178 **Supplementary Figure 20. Genetic interactions between FMN-dependent flavoproteins**  
 179 **and Aβ42.** (A) Viability of Aβ42 strains with independent deletions of genes encoding FMN-  
 180 dependent flavoproteins on day 3. (B) Viability over time of Aβ42 strains with overexpression  
 181 of genes encoding FMN-dependent flavoproteins on day 1 (D1) and day 4 (D4). Results are  
 182 average values ± SD of biological triplicates. The asterisk (\*) indicates significant differences  
 183 ( $p < 0.05$ ). Source data are provided as a Source Data file.

184

185

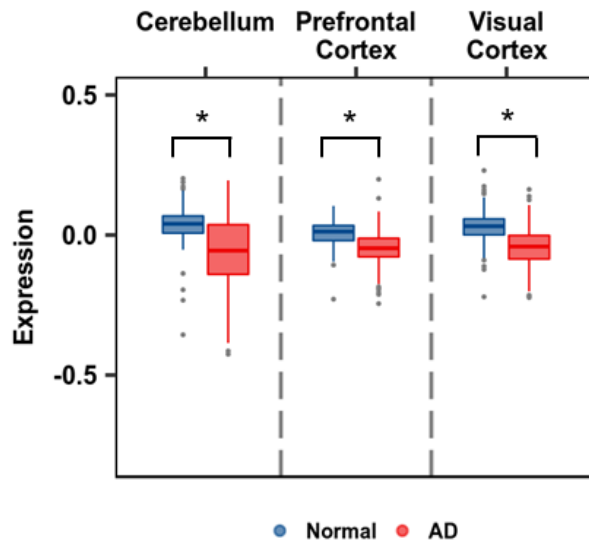

187

188 **Supplementary Figure 21.** The mRNA expression levels of human *DUS2* in the cerebellum,  
189 prefrontal cortex and visual cortex of normal controls and AD patients. Asterisks (\*) indicate  
190 significant differences ( $p\text{-adj} < 0.0001$ ).

191

192

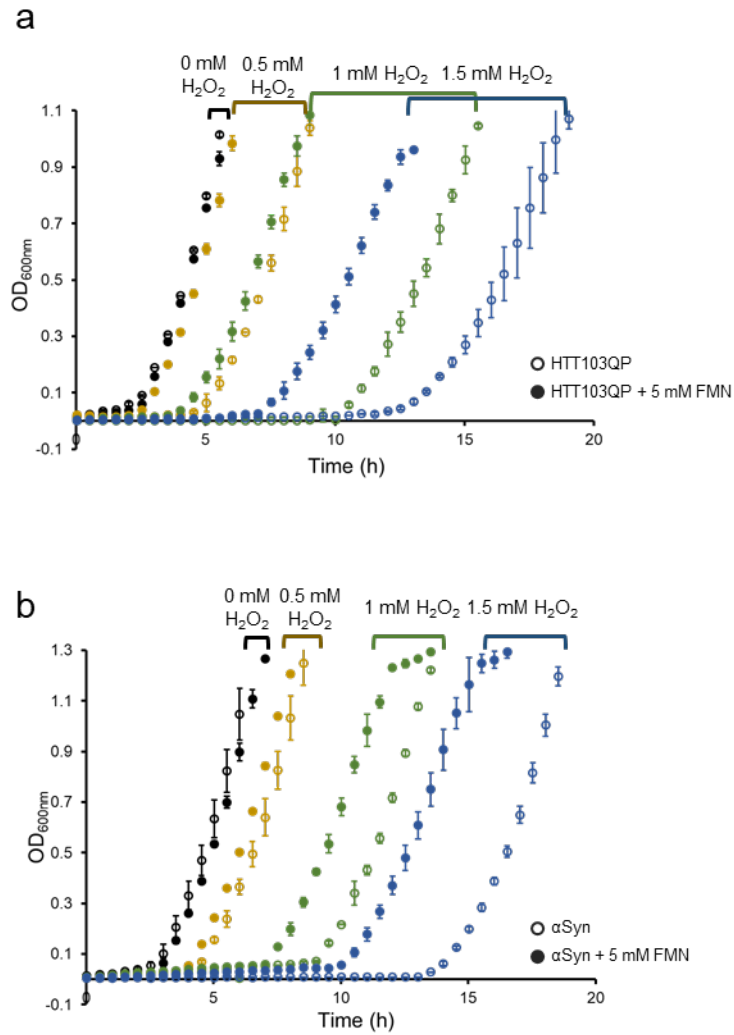

193

194

195 **Supplementary Figure 22.** HTT103QP strain (a) and the α-synuclein strain (b) display an  
 196 increased H<sub>2</sub>O<sub>2</sub> tolerance with FMN supplementation. Cells without or with 5 mM FMN  
 197 supplement were grown to OD ≈ 0.2 and treated with different concentrations of H<sub>2</sub>O<sub>2</sub>. Cell  
 198 growth was monitored using a microplate reader. Results shown are average values ± SD of  
 199 biological duplicates. Source data are provided as a Source Data file.

200

201



202 **Supplementary Table 1.** Distribution of GO terms among the nonessential mutants with  
 203 significantly altered A $\beta$ 42 toxicity via SAFE analysis.

| Domain             | GO biological process term                                       | Percentage (%) |
|--------------------|------------------------------------------------------------------|----------------|
| <b>Sensitivity</b> |                                                                  |                |
| 1                  | other                                                            | 2.23           |
| 2                  | Glycosylation, Protein Folding/Targeting, Cell Wall Biosynthesis | 21.65          |
| 3                  | Ribosome Biogenesis                                              | 0.26           |
| 4                  | Protein Degradation                                              | 1.71           |
| 7                  | MVB Sorting and pH-dependent Signaling                           | 2.60           |
| 12                 | DNA Replication and Repair                                       | 0.26           |
| 13                 | Transcription and Chromatin Organization                         | 0.39           |
| 14                 | Vesicle Traffic                                                  | 11.81          |
| 15                 | Cell Polarity and Morphogenesis                                  | 7.35           |
| 16                 | Mitosis and Chromosome Segregation                               | 1.18           |
| <b>Resistance</b>  |                                                                  |                |
| 1                  | other                                                            | 5.34           |
| 2                  | Glycosylation, Protein Folding/Targeting, Cell Wall Biosynthesis | 2.85           |
| 3                  | Ribosome Biogenesis                                              | 9.43           |
| 4                  | Protein Degradation                                              | 0.71           |
| 6                  | Nuclear-cytoplasmic Transport                                    | 1.42           |
| 9                  | tRNA Wobble Modification                                         | 0.71           |
| 10                 | Peroxisome                                                       | 0.53           |
| 11                 | Metabolism and Fatty Acid Biosynthesis                           | 1.78           |
| 12                 | DNA Replication and Repair                                       | 0.36           |
| 13                 | Transcription and Chromatin Organization                         | 9.07           |
| 15                 | Cell Polarity and Morphogenesis                                  | 7.30           |
| 16                 | Mitosis and Chromosome Segregation                               | 0.71           |
| 17                 | rRNA and ncRNA Processing                                        | 1.07           |
| 18                 | Respiration, Oxidative Phosphorylation, Mitochondrial Targeting  | 8.54           |

204

205 **Supplementary Table 2.** Distribution of GO terms among the essential mutants with  
 206 significantly altered A $\beta$ 42 toxicity via SAFE analysis.

| Domain             | GO biological process term                                       | Percentage (%) |
|--------------------|------------------------------------------------------------------|----------------|
| <b>Sensitivity</b> |                                                                  |                |
| 1                  | Other                                                            | 0.93           |
| 2                  | Glycosylation, Protein Folding/Targeting, Cell Wall Biosynthesis | 17.06          |
| 4                  | Protein Degradation                                              | 5.96           |
| 7                  | MVB Sorting and pH-dependent Signaling                           | 0.35           |
| 8                  | mRNA Processing                                                  | 0.70           |
| 11                 | Metabolism and Fatty Acid Biosynthesis                           | 0.35           |
| 12                 | DNA Replication and Repair                                       | 1.40           |
| 13                 | Transcription and Chromatin Organization                         | 1.17           |
| 14                 | Vesicle Traffic                                                  | 10.16          |
| 15                 | Cell Polarity and Morphogenesis                                  | 10.51          |
| 16                 | Mitosis and Chromosome Segregation                               | 1.17           |
| <b>Resistance</b>  |                                                                  |                |
| 1                  | Other                                                            | 4.00           |
| 2                  | Glycosylation, Protein Folding/Targeting, Cell Wall Biosynthesis | 0.72           |
| 4                  | Protein Degradation                                              | 0.92           |
| 5                  | Cytokinesis                                                      | 1.23           |
| 6                  | Nuclear-cytoplasmic Transport                                    | 3.39           |
| 8                  | mRNA Processing                                                  | 0.51           |
| 9                  | tRNA Wobble Modification                                         | 0.51           |
| 10                 | Peroxisome                                                       | 0.62           |
| 12                 | DNA Replication and Repair                                       | 5.34           |
| 13                 | Transcription and Chromatin Organization                         | 7.49           |
| 14                 | Vesicle Traffic                                                  | 0.31           |
| 15                 | Cell Polarity and Morphogenesis                                  | 0.92           |
| 16                 | Mitosis and Chromosome Segregation                               | 14.78          |
| 17                 | rRNA and ncRNA Processing                                        | 8.21           |
| 18                 | Respiration, Oxidative Phosphorylation, Mitochondrial Targeting  | 0.62           |

207

208

209 **Supplementary Table 3.** List of mutants in the protein secretion and degradation processes  
 210 that increase A $\beta$ 42 toxicity.

| Systematic name | Standard name | SGA score of run 1 | SGA score of run 2 |
|-----------------|---------------|--------------------|--------------------|
| YHR101C         | <i>BIG1</i>   | -1.377             | -1.505             |
| YPR181C         | <i>SEC23</i>  | -1.290             | -1.010             |
| YBR160W         | <i>CDC28</i>  | -1.125             | -1.002             |
| YMR298W         | <i>LIP1</i>   | -1.065             | -0.825             |
| YOR070C         | <i>GYP1</i>   | -1.042             | -0.887             |
| YOR336W         | <i>KRE5</i>   | -0.995             | -0.957             |
| YGL027C         | <i>CWH41</i>  | -0.965             | -0.687             |
| YOL031C         | <i>SIL1</i>   | -0.962             | -0.603             |
| YLL031C         | <i>GPI13</i>  | -0.923             | -1.002             |
| YML130C         | <i>ERO1</i>   | -0.909             | -0.845             |
| YFL031W         | <i>HAC1</i>   | -0.904             | -1.005             |
| YBR229C         | <i>ROT2</i>   | -0.895             | -1.121             |
| YJL002C         | <i>OST1</i>   | -0.892             | -0.916             |
| YOR085W         | <i>OST3</i>   | -0.862             | -0.621             |
| YDR182W         | <i>CDC1</i>   | -0.852             | -0.821             |
| YNL287W         | <i>SEC21</i>  | -0.831             | -0.766             |
| YDL126C         | <i>CDC48</i>  | -0.820             | -0.885             |
| YHR030C         | <i>SLT2</i>   | -0.815             | -0.766             |
| YJR075W         | <i>HOC1</i>   | -0.811             | -0.808             |
| YNL263C         | <i>YIF1</i>   | -0.803             | -1.116             |
| YBL040C         | <i>ERD2</i>   | -0.780             | -0.974             |
| YDR245W         | <i>MNN10</i>  | -0.779             | -1.004             |
| YNL322C         | <i>KRE1</i>   | -0.776             | -0.911             |
| YDR414C         | <i>ERD1</i>   | -0.744             | -0.585             |
| YNL291C         | <i>MID1</i>   | -0.731             | -0.919             |
| YLR262C         | <i>YPT6</i>   | -0.715             | -0.915             |
| YMR264W         | <i>CUE1</i>   | -0.712             | -0.677             |
| YGR172C         | <i>YIP1</i>   | -0.703             | -0.554             |
| YNL307C         | <i>MCK1</i>   | -0.699             | -0.679             |
| YGR216C         | <i>GPI1</i>   | -0.687             | -0.500             |
| YMR307W         | <i>GAS1</i>   | -0.670             | -0.747             |
| YBR036C         | <i>CSG2</i>   | -0.663             | -0.711             |
| YER083C         | <i>GET2</i>   | -0.653             | -0.763             |
| YJR073C         | <i>OPI3</i>   | -0.635             | -0.567             |
| YNL051W         | <i>COG5</i>   | -0.633             | -0.546             |
| YJL029C         | <i>VPS53</i>  | -0.624             | -0.569             |
| YJR010C-A       | <i>SPC1</i>   | -0.580             | -0.788             |
| YCL001W         | <i>RER1</i>   | -0.579             | -0.635             |
| YAL053W         | <i>FLC2</i>   | -0.563             | -0.504             |
| YGR217W         | <i>CCH1</i>   | -0.557             | -0.542             |
| YBR015C         | <i>MNN2</i>   | -0.555             | -0.500             |
| YDR236C         | <i>FMN1</i>   | -0.554             | -0.656             |
| YAL058W         | <i>CNE1</i>   | -0.545             | -0.500             |
| YBR162W-A       | <i>YSY6</i>   | -0.521             | -0.685             |
| YDL232W         | <i>OST4</i>   | -0.513             | -0.615             |
| YGL055W         | <i>OLE1</i>   | -0.511             | -0.639             |
| YEL002C         | <i>WBP1</i>   | -0.500             | -0.706             |

212 **Supplementary Table 4.** List of mutants in protein secretion and degradation processes that  
213 reduce A $\beta$ 42 toxicity.

| Systematic name | Standard name | SGA score of run 1 | SGA score of run 2 |
|-----------------|---------------|--------------------|--------------------|
| YHR036W         | <i>BRL1</i>   | 0.872              | 0.558              |
| YML105C         | <i>SEC65</i>  | 0.852              | 0.532              |
| YLR100W         | <i>ERG27</i>  | 0.707              | 0.661              |
| YJL085W         | <i>EXO70</i>  | 0.705              | 0.554              |
| YDR437W         | <i>GPI19</i>  | 0.642              | 1.049              |
| YOR254C         | <i>SEC63</i>  | 0.623              | 0.602              |
| YKL154W         | <i>SRP102</i> | 0.541              | 0.559              |

214

215 **Supplementary Table 5.** Plasmids used in this study.

| Plasmids                  | Description                                                                                      | Sources    |
|---------------------------|--------------------------------------------------------------------------------------------------|------------|
| p416 GPD (empty vector)   | <i>CEN, Amp<sup>R</sup>, URA3, GPD1p, CYC1t</i>                                                  | 1          |
| p416 GPD-Aβ42             | <i>CEN, Amp<sup>R</sup>, URA3, GPD1p-Aβ42-CYC1t</i>                                              | 2          |
| pFA6a-natNT2              | <i>CEN, Amp<sup>R</sup>, TEF1p-natNT2-ADH1t</i>                                                  | 3          |
| pFA6a-hphNT1              | <i>CEN, Amp<sup>R</sup>, TEF1p-hphNT1-CYC1t</i>                                                  | 3          |
| p416 GPD-FMN1             | <i>CEN, Amp<sup>R</sup>, URA3, GPD1p-FMN1-CYC1t</i>                                              | This study |
| p416 GPD-RFK              | <i>CEN, Amp<sup>R</sup>, URA3, GPD1p-RFK-CYC1t</i>                                               | This study |
| p416 GPD-CYB2             | <i>CEN, Amp<sup>R</sup>, URA3, GPD1p-CYB2-CYC1t</i>                                              | This study |
| p416 GPD-GLT1             | <i>CEN, Amp<sup>R</sup>, URA3, GPD1p-GLT1-CYC1t</i>                                              | This study |
| p416 GPD-MET5             | <i>CEN, Amp<sup>R</sup>, URA3, GPD1p-MET5-CYC1t</i>                                              | This study |
| p416 GPD-DUS2             | <i>CEN, Amp<sup>R</sup>, URA3, GPD1p-DUS2-CYC1t</i>                                              | This study |
| pYES2-HTT103QP            | <i>2μ, Amp<sup>R</sup>, URA3, GAL1p-HTT103QP-GFP-CYC1t</i>                                       | 4          |
| p416 GPD-HTT103QP         | <i>CEN, Amp<sup>R</sup>, URA3, GPD1p-HTT103QP-GFP-CYC1t</i>                                      | This study |
| pUG23 α-syn               | <i>CEN, Amp<sup>R</sup>, HIS3, MET25p-α-synuclein-EGFP-CYC1t</i>                                 | 5          |
| P5586 (MoBY empty vector) | <i>CEN, KanMX<sup>R</sup>, Hygromycin B<sup>R</sup>, Tetracycline<sup>R</sup>, URA3</i>          | 6          |
| pERD2-MoBY                | <i>CEN, KanMX<sup>R</sup>, Hygromycin B<sup>R</sup>, Tetracycline<sup>R</sup>, URA3, ERD2*</i>   | 6          |
| pCDC1-MoBY                | <i>CEN, KanMX<sup>R</sup>, Hygromycin B<sup>R</sup>, Tetracycline<sup>R</sup>, URA3, CDC1*</i>   | 6          |
| pFMN1-MoBY                | <i>CEN, KanMX<sup>R</sup>, Hygromycin B<sup>R</sup>, Tetracycline<sup>R</sup>, URA3, FMN1*</i>   | 6          |
| pFRQ1-MoBY                | <i>CEN, KanMX<sup>R</sup>, Hygromycin B<sup>R</sup>, Tetracycline<sup>R</sup>, URA3, FRQ1*</i>   | 6          |
| pWBP1-MoBY                | <i>CEN, KanMX<sup>R</sup>, Hygromycin B<sup>R</sup>, Tetracycline<sup>R</sup>, URA3, WBP1*</i>   | 6          |
| pYIP1-MoBY                | <i>CEN, KanMX<sup>R</sup>, Hygromycin B<sup>R</sup>, Tetracycline<sup>R</sup>, URA3, YIP1*</i>   | 6          |
| pGPI1-MoBY                | <i>CEN, KanMX<sup>R</sup>, Hygromycin B<sup>R</sup>, Tetracycline<sup>R</sup>, URA3, GPI1*</i>   | 6          |
| pOST1-MoBY                | <i>CEN, KanMX<sup>R</sup>, Hygromycin B<sup>R</sup>, Tetracycline<sup>R</sup>, URA3, OST1*</i>   | 6          |
| pGFA1-MoBY                | <i>CEN, KanMX<sup>R</sup>, Hygromycin B<sup>R</sup>, Tetracycline<sup>R</sup>, URA3, GFA1*</i>   | 6          |
| pSRP102-MoBY              | <i>CEN, KanMX<sup>R</sup>, Hygromycin B<sup>R</sup>, Tetracycline<sup>R</sup>, URA3, SRP102*</i> | 6          |
| pERG27-MoBY               | <i>CEN, KanMX<sup>R</sup>, Hygromycin B<sup>R</sup>, Tetracycline<sup>R</sup>, URA3, ERG27*</i>  | 6          |
| pERO1-MoBY                | <i>CEN, KanMX<sup>R</sup>, Hygromycin B<sup>R</sup>, Tetracycline<sup>R</sup>, URA3, ERO1*</i>   | 6          |
| pSEC21-MoBY               | <i>CEN, KanMX<sup>R</sup>, Hygromycin B<sup>R</sup>, Tetracycline<sup>R</sup>, URA3, SEC21*</i>  | 6          |
| pKRE5-MoBY                | <i>CEN, KanMX<sup>R</sup>, Hygromycin B<sup>R</sup>, Tetracycline<sup>R</sup>, URA3, KRE5*</i>   | 6          |
| pTHI80-MoBY               | <i>CEN, KanMX<sup>R</sup>, Hygromycin B<sup>R</sup>, Tetracycline<sup>R</sup>, URA3, THI80*</i>  | 6          |
| pGPI13-MoBY               | <i>CEN, KanMX<sup>R</sup>, Hygromycin B<sup>R</sup>, Tetracycline<sup>R</sup>, URA3, GPI13*</i>  | 6          |
| pUPS1-MoBY                | <i>CEN, KanMX<sup>R</sup>, Hygromycin B<sup>R</sup>, Tetracycline<sup>R</sup>, URA3, UPS1*</i>   | 6          |
| pOST3-MoBY                | <i>CEN, KanMX<sup>R</sup>, Hygromycin B<sup>R</sup>, Tetracycline<sup>R</sup>, URA3, OST3*</i>   | 6          |
| pCNE1-MoBY                | <i>CEN, KanMX<sup>R</sup>, Hygromycin B<sup>R</sup>, Tetracycline<sup>R</sup>, URA3, CNE1*</i>   | 6          |
| pCWH41-MoBY               | <i>CEN, KanMX<sup>R</sup>, Hygromycin B<sup>R</sup>, Tetracycline<sup>R</sup>, URA3, CWH41*</i>  | 6          |
| pSNF4-MoBY                | <i>CEN, KanMX<sup>R</sup>, Hygromycin B<sup>R</sup>, Tetracycline<sup>R</sup>, URA3, SNF4*</i>   | 6          |
| pROT2-MoBY                | <i>CEN, KanMX<sup>R</sup>, Hygromycin B<sup>R</sup>, Tetracycline<sup>R</sup>, URA3, ROT2*</i>   | 6          |
| pYDJ1-MoBY                | <i>CEN, KanMX<sup>R</sup>, Hygromycin B<sup>R</sup>, Tetracycline<sup>R</sup>, URA3, YDJ1*</i>   | 6          |
| pRER1-MoBY                | <i>CEN, KanMX<sup>R</sup>, Hygromycin B<sup>R</sup>, Tetracycline<sup>R</sup>, URA3, RER1*</i>   | 6          |
| pECAS9-gRNA-KanMX-tHFD1   | <i>2μ, Amp<sup>R</sup>, KanMX<sup>R</sup>, TEF1p-eCas9-CYC1t, gRNA-HFD1</i>                      | 7          |
| pECAS9-gRNA-KanMX-XI-3    | <i>2μ, Amp<sup>R</sup>, KanMX<sup>R</sup>, TEF1p-eCas9-CYC1t, gRNA-XI-3</i>                      | This study |

pECAS9-gRNA-  
KanMX-XII-5

*2μ, Amp<sup>R</sup>, KanMX<sup>R</sup>, TEF1p-eCas9-CYC1t, gRNA-XII-5*

This study

---

216 \*Gene expression is controlled by its native promoter and terminator.

217

218 **Supplementary Table 6.** Strains used in this study.

| Strains                                            | Description                                                                                                                                                                                                                                                                                                          | Background | Sources      | Experiments and Figures                      |
|----------------------------------------------------|----------------------------------------------------------------------------------------------------------------------------------------------------------------------------------------------------------------------------------------------------------------------------------------------------------------------|------------|--------------|----------------------------------------------|
| Y7092                                              | <i>MAT<math>\alpha</math> can1<math>\Delta</math>::STE2pr-his5 lyp1<math>\Delta</math> ura3<math>\Delta</math>0 leu2<math>\Delta</math>0 his3<math>\Delta</math>1 met15<math>\Delta</math>0</i>                                                                                                                      | BY4742     | <sup>8</sup> | SGA start strain                             |
| Control                                            | <i>MAT<math>\alpha</math> can1<math>\Delta</math>::STE2pr-his5 lyp1<math>\Delta</math> ura3<math>\Delta</math>0 leu2<math>\Delta</math>0 his3<math>\Delta</math>1 met15<math>\Delta</math>0 XI-3::GPDp-CYC1t+TEF1p-natNT2-ADH1t XII-5::GPDp-CYC1t+TEF1p-hphNT1-ADH1t</i>                                             | BY4742     | This study   | SGA query strain<br>Fig.1, 2a, S1-S6         |
| A $\beta$ 42                                       | <i>MAT<math>\alpha</math> can1<math>\Delta</math>::STE2pr-his5 lyp1<math>\Delta</math> ura3<math>\Delta</math>0 leu2<math>\Delta</math>0 his3<math>\Delta</math>1 met15<math>\Delta</math>0 XI-3::GPDp-A<math>\beta</math>42-CYC1t+TEF1p-natNT2-ADH1t XII-5::GPDp-A<math>\beta</math>42-CYC1t+TEF1p-hphNT1-ADH1t</i> | BY4742     | This study   |                                              |
| A $\beta$ 42 <i>cwh41<math>\Delta</math></i>       | <i>MAT<math>\alpha</math> A<math>\beta</math>42 <i>cwh41<math>\Delta</math>::kanMX4</i></i>                                                                                                                                                                                                                          | BY4741     | This study   | Random spore analysis<br>Table 1             |
| A $\beta$ 42 <i>ost3<math>\Delta</math></i>        | <i>MAT<math>\alpha</math> A<math>\beta</math>42 <i>ost3<math>\Delta</math>::kanMX4</i></i>                                                                                                                                                                                                                           | BY4741     | This study   |                                              |
| A $\beta$ 42 <i>rer1<math>\Delta</math></i>        | <i>MAT<math>\alpha</math> A<math>\beta</math>42 <i>rer1<math>\Delta</math>::kanMX4</i></i>                                                                                                                                                                                                                           | BY4741     | This study   |                                              |
| A $\beta$ 42 <i>cne1<math>\Delta</math></i>        | <i>MAT<math>\alpha</math> A<math>\beta</math>42 <i>cne1<math>\Delta</math>::kanMX4</i></i>                                                                                                                                                                                                                           | BY4741     | This study   |                                              |
| A $\beta$ 42 <i>rot2<math>\Delta</math></i>        | <i>MAT<math>\alpha</math> A<math>\beta</math>42 <i>rot2<math>\Delta</math>::kanMX4</i></i>                                                                                                                                                                                                                           | BY4741     | This study   |                                              |
| A $\beta$ 42 <i>ydj1<math>\Delta</math></i>        | <i>MAT<math>\alpha</math> A<math>\beta</math>42 <i>ydj1<math>\Delta</math>::kanMX4</i></i>                                                                                                                                                                                                                           | BY4741     | This study   |                                              |
| A $\beta$ 42 <i>ups1<math>\Delta</math></i>        | <i>MAT<math>\alpha</math> A<math>\beta</math>42 <i>ups1<math>\Delta</math>::kanMX4</i></i>                                                                                                                                                                                                                           | BY4741     | This study   |                                              |
| A $\beta$ 42 <i>snf4<math>\Delta</math></i>        | <i>MAT<math>\alpha</math> A<math>\beta</math>42 <i>snf4<math>\Delta</math>::kanMX4</i></i>                                                                                                                                                                                                                           | BY4741     | This study   |                                              |
| A $\beta$ 42 <i>ero1</i>                           | <i>MAT<math>\alpha</math> A<math>\beta</math>42 <i>ero1::kanMX4</i></i>                                                                                                                                                                                                                                              | BY4741     | This study   |                                              |
| A $\beta$ 42 <i>ost1</i>                           | <i>MAT<math>\alpha</math> A<math>\beta</math>42 <i>ost1::kanMX4</i></i>                                                                                                                                                                                                                                              | BY4741     | This study   |                                              |
| A $\beta$ 42 <i>erd2</i>                           | <i>MAT<math>\alpha</math> A<math>\beta</math>42 <i>erd2::kanMX4</i></i>                                                                                                                                                                                                                                              | BY4741     | This study   |                                              |
| A $\beta$ 42 <i>cdc1</i>                           | <i>MAT<math>\alpha</math> A<math>\beta</math>42 <i>cdc1::kanMX4</i></i>                                                                                                                                                                                                                                              | BY4741     | This study   |                                              |
| A $\beta$ 42 <i>kre5</i>                           | <i>MAT<math>\alpha</math> A<math>\beta</math>42 <i>kre5::kanMX4</i></i>                                                                                                                                                                                                                                              | BY4741     | This study   |                                              |
| A $\beta$ 42 <i>sec21</i>                          | <i>MAT<math>\alpha</math> A<math>\beta</math>42 <i>sec21::kanMX4</i></i>                                                                                                                                                                                                                                             | BY4741     | This study   |                                              |
| A $\beta$ 42 <i>fmn1</i>                           | <i>MAT<math>\alpha</math> A<math>\beta</math>42 <i>fmn1::kanMX4</i></i>                                                                                                                                                                                                                                              | BY4741     | This study   |                                              |
| A $\beta$ 42 <i>gpi13</i>                          | <i>MAT<math>\alpha</math> A<math>\beta</math>42 <i>gpi13::kanMX4</i></i>                                                                                                                                                                                                                                             | BY4741     | This study   |                                              |
| A $\beta$ 42 <i>gpi1</i>                           | <i>MAT<math>\alpha</math> A<math>\beta</math>42 <i>gpi1::kanMX4</i></i>                                                                                                                                                                                                                                              | BY4741     | This study   |                                              |
| A $\beta$ 42 <i>yip1</i>                           | <i>MAT<math>\alpha</math> A<math>\beta</math>42 <i>yip1::kanMX4</i></i>                                                                                                                                                                                                                                              | BY4741     | This study   |                                              |
| A $\beta$ 42 <i>erg27</i>                          | <i>MAT<math>\alpha</math> A<math>\beta</math>42 <i>erg27::kanMX4</i></i>                                                                                                                                                                                                                                             | BY4741     | This study   |                                              |
| A $\beta$ 42 <i>frq1</i>                           | <i>MAT<math>\alpha</math> A<math>\beta</math>42 <i>frq1::kanMX4</i></i>                                                                                                                                                                                                                                              | BY4741     | This study   |                                              |
| A $\beta$ 42 <i>srp102</i>                         | <i>MAT<math>\alpha</math> A<math>\beta</math>42 <i>srp102::kanMX4</i></i>                                                                                                                                                                                                                                            | BY4741     | This study   |                                              |
| A $\beta$ 42 <i>gfa1</i>                           | <i>MAT<math>\alpha</math> A<math>\beta</math>42 <i>gfa1::kanMX4</i></i>                                                                                                                                                                                                                                              | BY4741     | This study   |                                              |
| A $\beta$ 42 <i>thi80</i>                          | <i>MAT<math>\alpha</math> A<math>\beta</math>42 <i>thi80::kanMX4</i></i>                                                                                                                                                                                                                                             | BY4741     | This study   |                                              |
| A $\beta$ 42 <i>cwh41<math>\Delta</math> CWH41</i> | <i>MAT<math>\alpha</math> A<math>\beta</math>42 <i>cwh41<math>\Delta</math>::kanMX4 pCWH41-MoBY</i></i>                                                                                                                                                                                                              | BY4741     | This study   |                                              |
| A $\beta$ 42 <i>ost3<math>\Delta</math> OST3</i>   | <i>MAT<math>\alpha</math> A<math>\beta</math>42 <i>ost3<math>\Delta</math>::kanMX4 pOST3-MoBY</i></i>                                                                                                                                                                                                                | BY4741     | This study   | Complement-ation assay<br>Fig. 3b,3d, S8, S9 |
| A $\beta$ 42 <i>rer1<math>\Delta</math> RER1</i>   | <i>MAT<math>\alpha</math> A<math>\beta</math>42 <i>rer1<math>\Delta</math>::kanMX4 pRER1-MoBY</i></i>                                                                                                                                                                                                                | BY4741     | This study   |                                              |
| A $\beta$ 42 <i>cne1<math>\Delta</math> CNE1</i>   | <i>MAT<math>\alpha</math> A<math>\beta</math>42 <i>cne1<math>\Delta</math>::kanMX4 pCNE1-MoBY</i></i>                                                                                                                                                                                                                | BY4741     | This study   |                                              |
| A $\beta$ 42 <i>rot2<math>\Delta</math> ROT2</i>   | <i>MAT<math>\alpha</math> A<math>\beta</math>42 <i>rot2<math>\Delta</math>::kanMX4 pROT2-MoBY</i></i>                                                                                                                                                                                                                | BY4741     | This study   |                                              |
| A $\beta$ 42 <i>ydj1<math>\Delta</math> YDJ1</i>   | <i>MAT<math>\alpha</math> A<math>\beta</math>42 <i>ydj1<math>\Delta</math>::kanMX4 pYDJ1-MoBY</i></i>                                                                                                                                                                                                                | BY4741     | This study   |                                              |
| A $\beta$ 42 <i>ups1<math>\Delta</math> UPS1</i>   | <i>MAT<math>\alpha</math> A<math>\beta</math>42 <i>ups1<math>\Delta</math>::kanMX4 pUPS1-MoBY</i></i>                                                                                                                                                                                                                | BY4741     | This study   |                                              |
| A $\beta$ 42 <i>snf4<math>\Delta</math> SNF4</i>   | <i>MAT<math>\alpha</math> A<math>\beta</math>42 <i>snf4<math>\Delta</math>::kanMX4 pSNF4-MoBY</i></i>                                                                                                                                                                                                                | BY4741     | This study   |                                              |
| A $\beta$ 42 <i>ero1 ERO1</i>                      | <i>MAT<math>\alpha</math> A<math>\beta</math>42 <i>ero1::kanMX4 pERO1-MoBY</i></i>                                                                                                                                                                                                                                   | BY4741     | This study   |                                              |
| A $\beta$ 42 <i>ost1 OST1</i>                      | <i>MAT<math>\alpha</math> A<math>\beta</math>42 <i>ost1::kanMX4 pOST1-MoBY</i></i>                                                                                                                                                                                                                                   | BY4741     | This study   |                                              |
| A $\beta$ 42 <i>erd2 ERD2</i>                      | <i>MAT<math>\alpha</math> A<math>\beta</math>42 <i>erd2::kanMX4 pERD2-MoBY</i></i>                                                                                                                                                                                                                                   | BY4741     | This study   |                                              |
| A $\beta$ 42 <i>cdc1 CDC1</i>                      | <i>MAT<math>\alpha</math> A<math>\beta</math>42 <i>cdc1::kanMX4 pCDC1-MoBY</i></i>                                                                                                                                                                                                                                   | BY4741     | This study   |                                              |

|                           |                                                                                            |                |                          |                                                                                                                                             |
|---------------------------|--------------------------------------------------------------------------------------------|----------------|--------------------------|---------------------------------------------------------------------------------------------------------------------------------------------|
| <i>Aβ42 kre5 KRE5</i>     | <i>MATa Aβ42 kre5::kanMX4 pKRE5-MoBY</i>                                                   | BY4741         | This study               |                                                                                                                                             |
| <i>Aβ42 sec21 SEC21</i>   | <i>MATa Aβ42 sec21::kanMX4 pSEC21-MoBY</i>                                                 | BY4741         | This study               |                                                                                                                                             |
| <i>Aβ42 fmn1 FMN1</i>     | <i>MATa Aβ42 fmn1::kanMX4 pFMN1-MoBY</i>                                                   | BY4741         | This study               |                                                                                                                                             |
| <i>Aβ42 gpi13 GPI13</i>   | <i>MATa Aβ42 gpi13::kanMX4 pGPI13-MoBY</i>                                                 | BY4741         | This study               |                                                                                                                                             |
| <i>Aβ42 gpi1 GPI1</i>     | <i>MATa Aβ42 gpi1::kanMX4 pGPI1-MoBY</i>                                                   | BY4741         | This study               |                                                                                                                                             |
| <i>Aβ42 yip1 YIP1</i>     | <i>MATa Aβ42 yip1::kanMX4 pYIP1-MoBY</i>                                                   | BY4741         | This study               |                                                                                                                                             |
| <i>Aβ42 erg27 ERG27</i>   | <i>MATa Aβ42 erg27::kanMX4 pERG27-MoBY</i>                                                 | BY4741         | This study               |                                                                                                                                             |
| <i>Aβ42 frq1 FRQ1</i>     | <i>MATa Aβ42 frq1::kanMX4 pFRQ1-MoBY</i>                                                   | BY4741         | This study               |                                                                                                                                             |
| <i>Aβ42 srp102 SRP102</i> | <i>MATa Aβ42 srp102::kanMX4 pSRP102-MoBY</i>                                               | BY4741         | This study               |                                                                                                                                             |
| <i>Aβ42 gfa1 GFA1</i>     | <i>MATa Aβ42 gfa1::kanMX4 pGFA1-MoBY</i>                                                   | BY4741         | This study               |                                                                                                                                             |
| <i>Aβ42 thi80 THI80</i>   | <i>MATa Aβ42 thi80::kanMX4 pTHI80-MoBY</i>                                                 | BY4741         | This study               |                                                                                                                                             |
| <i>WT Hsp104-GFP</i>      | <i>MATa his3Δ::kanMX4 can1Δ::STE2pr-Sp_his5 lyp1Δ ura3Δ0 met15Δ0 HSP104-GFP-LEU2</i>       | BY4741         | SGA library <sup>9</sup> | Inclusion body morphology test                                                                                                              |
| <i>fmn1</i>               | <i>fmn1::KanMX4</i>                                                                        | BY4741         | TS-V6 collection         | Fig. 4a                                                                                                                                     |
| <i>fmn1 Hsp104-GFP</i>    | <i>MATa his3Δ0 fmn1::kanMX4 can1Δ::STE2pr-Sp_his5 lyp1Δ ura3Δ0 met15Δ0 HSP104-GFP-LEU2</i> | BY4741         | This study               |                                                                                                                                             |
| Control (CEN)             | <i>MATa his3Δ1 ura3-52 MAL2-8c SUC2 XI-3::GPDp-CYC1t XII-5::GPDp-CYC1t</i>                 | CEN.PK 113-11C | This study               | Growth rate, NADP(H) and NAD(H) measurement, H <sub>2</sub> O <sub>2</sub> treatment, RNA-seq, qPCR, viability, AZE treatment, western blot |
| <i>Aβ42</i> (CEN)         | <i>MATa his3Δ1 ura3-52 MAL2-8c SUC2 XI-3::GPDp-Aβ42-CYC1t XII-5::GPDp-Aβ42-CYC1t</i>       | CEN.PK 113-11C | This study               | Fig.3c, 3e, 3f, 4b,4c,4d, 5, 6, S10-S19                                                                                                     |
| <i>rfs1Δ</i>              | <i>rfs1::KanMX4</i>                                                                        | BY4741         | SGA-V2                   | Flavoprotein experiments                                                                                                                    |
| <i>pst1Δ</i>              | <i>pst2::KanMX4 Aβ42</i> (CEN)                                                             | BY4741         | SGA-V2                   | Fig. S20                                                                                                                                    |
| <i>cyb2Δ</i>              | <i>cyb2::KanMX4</i>                                                                        | BY4741         | SGA-V2                   |                                                                                                                                             |
| <i>lot6Δ</i>              | <i>lot6Δ::KanMX4</i>                                                                       | BY4741         | SGA-V2                   |                                                                                                                                             |
| <i>dus2Δ</i>              | <i>dus2Δ::KanMX4</i>                                                                       | BY4741         | SGA-V2                   |                                                                                                                                             |
| <i>oye2Δ</i>              | <i>oye2Δ::KanMX4</i>                                                                       | BY4741         | SGA-V2                   |                                                                                                                                             |
| <i>aro2Δ</i>              | <i>aro2Δ::KanMX4</i>                                                                       | BY4741         | SGA-V2                   |                                                                                                                                             |
| <i>glt1Δ</i>              | <i>glt1Δ::KanMX4</i>                                                                       | BY4741         | SGA-V2                   |                                                                                                                                             |
| <i>dus3Δ</i>              | <i>dus3Δ::KanMX4</i>                                                                       | BY4741         | SGA-V2                   |                                                                                                                                             |
| <i>dus4Δ</i>              | <i>dus4Δ::KanMX4</i>                                                                       | BY4741         | SGA-V2                   |                                                                                                                                             |
| <i>met5Δ</i>              | <i>met5Δ::KanMX4</i>                                                                       | BY4741         | SGA-V2                   |                                                                                                                                             |
| <i>Aβ42 rfs1Δ</i>         | <i>rfs1Δ::kanMX4 p416 GPD-Aβ42</i>                                                         | BY4741         | This study               |                                                                                                                                             |
| <i>Aβ42 pst1Δ</i>         | <i>pst1Δ::kanMX4 p416 GPD-Aβ42</i>                                                         | BY4741         | This study               |                                                                                                                                             |
| <i>Aβ42 cyb2Δ</i>         | <i>cyb2Δ::kanMX4 p416 GPD-Aβ42</i>                                                         | BY4741         | This study               |                                                                                                                                             |
| <i>Aβ42 lot6Δ</i>         | <i>lot6Δ::kanMX4 p416 GPD-Aβ42</i>                                                         | BY4741         | This study               |                                                                                                                                             |
| <i>Aβ42 dus2Δ</i>         | <i>dus2Δ::kanMX4 p416 GPD-Aβ42</i>                                                         | BY4741         | This study               |                                                                                                                                             |
| <i>Aβ42 oye2Δ</i>         | <i>oye2Δ::kanMX4 p416 GPD-Aβ42</i>                                                         | BY4741         | This study               |                                                                                                                                             |



|                   |                                                           |                |            |                                                    |
|-------------------|-----------------------------------------------------------|----------------|------------|----------------------------------------------------|
| <i>Aβ42 aro2Δ</i> | <i>aro2Δ::kanMX4 p416 GPD-Aβ42</i>                        | BY4741         | This study |                                                    |
| <i>Aβ42 glt1Δ</i> | <i>glt1Δ::kanMX4 p416 GPD-Aβ42</i>                        | BY4741         | This study |                                                    |
| <i>Aβ42 dus3Δ</i> | <i>dus3Δ::kanMX4 p416 GPD-Aβ42</i>                        | BY4741         | This study |                                                    |
| <i>Aβ42 dus4Δ</i> | <i>dus4Δ::kanMX4 p416 GPD-Aβ42</i>                        | BY4741         | This study |                                                    |
| <i>Aβ42 met5Δ</i> | <i>met5Δ::kanMX4 p416 GPD-Aβ42</i>                        | BY4741         | This study |                                                    |
| <i>Aβ42 DUS2</i>  | <i>Aβ42 (CEN) p416 GPD-DUS2</i>                           | CEN.PK 113-11C | This study |                                                    |
| <i>Aβ42 CYB2</i>  | <i>Aβ42 (CEN) p416 GPD-CYB2</i>                           | CEN.PK 113-11C | This study |                                                    |
| <i>Aβ42 MET5</i>  | <i>Aβ42 (CEN) p416 GPD-MET5</i>                           | CEN.PK 113-11C | This study |                                                    |
| <i>Aβ42 GLT1</i>  | <i>Aβ42 (CEN) p416 GPD-GLT1</i>                           | CEN.PK 113-11C | This study |                                                    |
| <i>HTT103QP</i>   | <i>MATa his3Δ1 ura3-52 MAL2-8c SUC2 p416 GPD-HTT103QP</i> | CEN.PK 113-11C | This study | H <sub>2</sub> O <sub>2</sub> treatment, viability |
| <i>α-syn</i>      | <i>MATa his3Δ1 ura3-52 MAL2-8c SUC2 pUG23 α-syn</i>       | CEN.PK 113-11C | This study | Fig. 7, S22                                        |

| Primers       | Sequence (5'-3')                                                 |
|---------------|------------------------------------------------------------------|
| XI-3-up-L1    | AGTTACTTGCTCTATGCGTTTGC                                          |
| XI-3-up-R1    | GTATTCTTTGAAATGGCGAGTATTGATAATGATAAACTAATCAGACGCACGCTTGGCGTC     |
| Aβ42-L        | AGTTTATCATTATCAACTCGCCATTT                                       |
| Aβ42-R        | GCAAATTAAGCCTTCGAGCGTCCC                                         |
| NatNT2-L      | GAGAAGGTTTTGGGACGCTCGAAGGCTTTAATTTGCCGTACGCTGCAGGTCGACGGATC      |
| NatNT2-R      | GTTTAATAATGATCTGTATTGCTGGCTCAATCCACGTAATCGATGAATTCGAGCTCG        |
| XI-3-down-L   | TTACGTGGATTGAGCCAGCAATAC                                         |
| XI-3-down-R   | GAGAATCCGGACCAGCAGATAATG                                         |
| XII-5-up-L    | CAATCTGGCGGCTTGAGTTCTCAAC                                        |
| XII-5-up-R    | GAGAAGGTTTTGGGACGCTCGAAGGCTTTAATTTGCTCAAACCGTTATAGCGGTCTCC       |
| HphNT1-L      | CTTTGAAATGGCGAGTATTGATAATGATAAACTCGTACGCTGCAGGTCGACGG            |
| HphNT1-R      | CTTATTTAATAATAAAAATCATAAATCATAAGAAATTCGCTTATTCCTTTGCCCTCGGACGAG  |
| ADHt-L        | GCGAATTTCTTATGATTTATGATTTTT                                      |
| ADHt-R        | GCATATCTACAATTGGGTGAAATGG                                        |
| XII-5-down-L1 | CTGCAAATCGCTCCCCATTTACCCAATTGTAGATATGCGCAACTCAGAAGTTTGACAGCAAGC  |
| XII-5-down-R  | CTGCGATACCTTTTGTGATGGCTAAAC                                      |
| XII-5-down-L2 | CTTTGAAATGGCGAGTATTGATAATGATAAACTGCAACTCAGAAGTTTGACAGCAAGC       |
| XI-3-down-L2  | GAGAAGGTTTTGGGACGCTCGAAGGCTTTAATTTGCTTACGTGGATTGAGCCAGCAATACAG   |
| XI-3-down-R2  | GAGAATCCGGACCAGCAGATAATGCATGC                                    |
| FMN1-L1       | CGCGAATTC AACAAAATGTTTACGTGGACTATTTATGTTTTG                      |
| FMN1-R1       | CCCAAGCTTCTATAATTGTTGTTGAATACTTG                                 |
| ACT-L         | GCCTTCTACGTTTCCATCCA                                             |
| ACT-R         | GGCCAAATCGATTCTCAAAA                                             |
| FMN1-L2       | TCGATTTGCCAATACCTGCG                                             |
| FMN1-R2       | CGCCTTGTTTCCACCGATAG                                             |
| RFK-L         | CGCGAATTC AACAAAATGAGACATTTGCCTTATTTTTG                          |
| RFK-R         | CCCAAGCTTTTAGTGACCGTTCATTATTTTGG                                 |
| CAS9-L1       | GAACGGTTCGAGAAGCTCATA                                            |
| CAS9-R1       | TAAGTTGGTACCCGAGGTAC                                             |
| CAS9-L2       | TGCGGCGTACATCACTTTGT                                             |
| CAS9-R2       | TATGAGCTTCTCGACCGTTC                                             |
| P297          | ATATGTCTCTAATTTTTGGAAGTTTTAGAGCTAGAAATAGC                        |
| P298          | TTCCAAAATTAGAGACATATGATCATTATCTTTCACTGC                          |
| P299          | TTGTACAGTGTACATCAGTTTTAGAGCTAGAAATAGC                            |
| P300          | CTGATGTGACACTGTGACAAGATCATTATCTTTCACTGC                          |
| Hsp104-GFP-L  | CAAGAATTTGGTCATGGGTGCTG                                          |
| Hsp104-GFP-R  | CGTTGGAATCATCGCTGTTTCG                                           |
| pBACKbone-F   | TGATAATCTCATGACCAAAATCCC                                         |
| pBACKbone-R   | GAACGAAAATCACGTTAAGGG                                            |
| tCYC1-F       | CTCGAGTCATGTAATTAGTTATGTC                                        |
| GAP-R         | TCGAAACTAAGTTCTGGTGTTTTAA                                        |
| GAP-dus2-F    | CTTTTTTTTAGTTTTAAAACACCAGAACTTAGTTTCGAATGGTTACATATGCTGGAAAAC     |
| tCYC1-dus2-R  | GAATGTAAGCGTGACATAACTAATTACATGACTCGAGTTATATATCTGTGGGAAGGGGTAC    |
| GAP-cyb2-F    | CTTTTTTTTAGTTTTAAAACACCAGAACTTAGTTTCGAATGCTAAAATACAAACCTTTACTAAA |
| tCYC1-cyb2-R  | ATGTAAGCGTGACATAACTAATTACATGACTCGAGTCATGCATCCTCAAATTCTGTAA       |
| GAP-glt1-F    | CTTTTTTTTAGTTTTAAAACACCAGAACTTAGTTTCGAATGCCAGTGTTGAAATCAGACA     |
| tCYC1-glt1-R  | GAATGTAAGCGTGACATAACTAATTACATGACTCGAGTTAGACTTGACTAGCTAATTCTTTCA  |
| GAP-met5-F    | CTTTTTTTTAGTTTTAAAACACCAGAACTTAGTTTCGAATGACTGCTTCTGACCTCTTG      |
| tCYC1-met5-R  | GAATGTAAGCGTGACATAACTAATTACATGACTCGAGTTAATAGGCATCTTCAGACACAT     |
| GAP-          | CTTTTTTTTAGTTTTAAAACACCAGAACTTAGTTTCGAATGGACTACAAGGACGACGAT      |

HTT103Q-F  
tCYC1-  
HTT103Q-R

GAATGTAAGCGTGACATAACTAATTACATGACTCGAGTTACTTGTACAGCTCGTCCAT

---

222 **Supplementary References**

- 223 1. Mumberg D, Muller R, Funk M. Yeast vectors for the controlled expression of heterologous  
224 proteins in different genetic backgrounds. *Gene* **156**, 119-122 (1995).
- 225  
226 2. Chen X, Petranovic D. Amyloid-beta peptide-induced cytotoxicity and mitochondrial  
227 dysfunction in yeast. *FEMS yeast research* **15**, (2015).
- 228  
229 3. Janke C, *et al.* A versatile toolbox for PCR-based tagging of yeast genes: new fluorescent  
230 proteins, more markers and promoter substitution cassettes. *Yeast (Chichester, England)* **21**,  
231 947-962 (2004).
- 232  
233 4. Berglund LL, Hao X, Liu B, Grantham J, Nyström T. Differential effects of soluble and  
234 aggregating polyQ proteins on cytotoxicity and type-1 myosin-dependent endocytosis in  
235 yeast. *Scientific Reports* **7**, 11328 (2017).
- 236  
237 5. Zabrocki P, *et al.* Characterization of  $\alpha$ -synuclein aggregation and synergistic toxicity with  
238 protein tau in yeast. **272**, 1386-1400 (2005).
- 239  
240 6. Ho CH, *et al.* A molecular barcoded yeast ORF library enables mode-of-action analysis of  
241 bioactive compounds. *Nature biotechnology* **27**, 369-377 (2009).
- 242  
243 7. Zhu Z, Zhou YJ, Kang M-K, Krivoruchko A, Buijs NA, Nielsen J. Enabling the synthesis of  
244 medium chain alkanes and 1-alkenes in yeast. *Metabolic Engineering* **44**, 81-88 (2017).
- 245  
246 8. Tong AHY, *et al.* Systematic Genetic Analysis with Ordered Arrays of Yeast Deletion Mutants.  
247 *Science* **294**, 2364 (2001).
- 248  
249 9. Hill Sandra M, *et al.* Asymmetric Inheritance of Aggregated Proteins and Age Reset in Yeast  
250 Are Regulated by Vac17-Dependent Vacuolar Functions. *Cell Reports* **16**, 826-838 (2016).

251

252

253
