# Supplementary material for: FMN reduces Amyloid-β toxicity in yeast by regulating redox status and cellular metabolism
Source: PubMed Central journal article supplement (PMC7018843; doi:10.1038/s41467-020-14525-4), 2020-02-13
Supplement: 41467_2020_14525_MOESM7_ESM.pdf [file 41467_2020_14525_MOESM7_ESM.pdf]

## Reporting Summary

Nature Research wishes to improve the reproducibility of the work that we publish. This form provides structure for consistency and transparency in reporting. For further information on Nature Research policies, see [Authors & Referees](#) and the [Editorial Policy Checklist](#).

### Statistics

For all statistical analyses, confirm that the following items are present in the figure legend, table legend, main text, or Methods section.

n/a Confirmed

- |                                     |                                     |                                                                                                                                                                                                                                                            |
|-------------------------------------|-------------------------------------|------------------------------------------------------------------------------------------------------------------------------------------------------------------------------------------------------------------------------------------------------------|
| <input type="checkbox"/>            | <input checked="" type="checkbox"/> | The exact sample size ( $n$ ) for each experimental group/condition, given as a discrete number and unit of measurement                                                                                                                                    |
| <input type="checkbox"/>            | <input checked="" type="checkbox"/> | A statement on whether measurements were taken from distinct samples or whether the same sample was measured repeatedly                                                                                                                                    |
| <input type="checkbox"/>            | <input checked="" type="checkbox"/> | The statistical test(s) used AND whether they are one- or two-sided<br><i>Only common tests should be described solely by name; describe more complex techniques in the Methods section.</i>                                                               |
| <input checked="" type="checkbox"/> | <input type="checkbox"/>            | A description of all covariates tested                                                                                                                                                                                                                     |
| <input type="checkbox"/>            | <input checked="" type="checkbox"/> | A description of any assumptions or corrections, such as tests of normality and adjustment for multiple comparisons                                                                                                                                        |
| <input type="checkbox"/>            | <input checked="" type="checkbox"/> | A full description of the statistical parameters including central tendency (e.g. means) or other basic estimates (e.g. regression coefficient) AND variation (e.g. standard deviation) or associated estimates of uncertainty (e.g. confidence intervals) |
| <input type="checkbox"/>            | <input checked="" type="checkbox"/> | For null hypothesis testing, the test statistic (e.g. $F$ , $t$ , $r$ ) with confidence intervals, effect sizes, degrees of freedom and $P$ value noted<br><i>Give <math>P</math> values as exact values whenever suitable.</i>                            |
| <input checked="" type="checkbox"/> | <input type="checkbox"/>            | For Bayesian analysis, information on the choice of priors and Markov chain Monte Carlo settings                                                                                                                                                           |
| <input checked="" type="checkbox"/> | <input type="checkbox"/>            | For hierarchical and complex designs, identification of the appropriate level for tests and full reporting of outcomes                                                                                                                                     |
| <input checked="" type="checkbox"/> | <input type="checkbox"/>            | Estimates of effect sizes (e.g. Cohen's $d$ , Pearson's $r$ ), indicating how they were calculated                                                                                                                                                         |

*Our web collection on [statistics for biologists](#) contains articles on many of the points above.*

### Software and code

Policy information about [availability of computer code](#)

**Data collection** This study included brain mRNA expression datasets information from the GeneNetwork (<http://www.genenetwork.org>). The microarray data and RNA-seq data from this study can be downloaded from the Genome Expression Omnibus website (GEO, <http://www.ncbi.nlm.nih.gov/geo/>) with series number GSE94793 and GSE128905, individually.

**Data analysis** We applied the data analysis through Nfcore-RNA-seq pipeline (<http://github.com/nf-core/rnaseq>), Platform for Integrative Analysis of Omics (PIANO) R package, Database for Annotation, Visualization and Integrated Discovery (DAVID, <https://david.ncifcrf.gov/>), pheatmap R package, R/growthrates package, Spatial Analysis of Functional Enrichment (SAFE) package. The differential gene expression and significance were calculated by the Benjamini-Hochberg method.

For manuscripts utilizing custom algorithms or software that are central to the research but not yet described in published literature, software must be made available to editors/reviewers. We strongly encourage code deposition in a community repository (e.g. GitHub). See the Nature Research [guidelines for submitting code & software](#) for further information.

### Data

Policy information about [availability of data](#)

All manuscripts must include a [data availability statement](#). This statement should provide the following information, where applicable:

- Accession codes, unique identifiers, or web links for publicly available datasets
- A list of figures that have associated raw data
- A description of any restrictions on data availability

The raw RNA-seq data from this study are available at the Genome Expression Omnibus website (GEO, <http://www.ncbi.nlm.nih.gov/geo/>) with series number GSE128905.

## Field-specific reporting

Please select the one below that is the best fit for your research. If you are not sure, read the appropriate sections before making your selection.

Life sciences       Behavioural & social sciences       Ecological, evolutionary & environmental sciences

For a reference copy of the document with all sections, see [nature.com/documents/nr-reporting-summary-flat.pdf](https://www.nature.com/documents/nr-reporting-summary-flat.pdf)

## Life sciences study design

All studies must disclose on these points even when the disclosure is negative.

|                 |                                                                                                                                                                                                                                 |
|-----------------|---------------------------------------------------------------------------------------------------------------------------------------------------------------------------------------------------------------------------------|
| Sample size     | A minimum of 500 cells were examined for each sample for fluorescent microscopy analyses, which was considered as sufficient to represent the sample with $1 \times 10^9$ cells (confidence level 95%, confidence interval 5%). |
| Data exclusions | No data were excluded from our analyses, except for RNAseq data processing, in which a quality check was performed using FastQC V0.11.7.                                                                                        |
| Replication     | The experiments were performed in three biological replicates unless specified explicitly. Significance of differences between strains were determined as mean $\pm$ SD using two-tailed student t-test.                        |
| Randomization   | Our samples were not allocated into experimental groups.                                                                                                                                                                        |
| Blinding        | The blinding is not relevant for our study, our study was performed in yeast <i>Saccharomyces cerevisiae</i> .                                                                                                                  |

## Reporting for specific materials, systems and methods

We require information from authors about some types of materials, experimental systems and methods used in many studies. Here, indicate whether each material, system or method listed is relevant to your study. If you are not sure if a list item applies to your research, read the appropriate section before selecting a response.

### Materials & experimental systems

| n/a                                 | Involvement in the study                                  |
|-------------------------------------|-----------------------------------------------------------|
| <input type="checkbox"/>            | <input checked="" type="checkbox"/> Antibodies            |
| <input type="checkbox"/>            | <input checked="" type="checkbox"/> Eukaryotic cell lines |
| <input checked="" type="checkbox"/> | <input type="checkbox"/> Palaeontology                    |
| <input checked="" type="checkbox"/> | <input type="checkbox"/> Animals and other organisms      |
| <input checked="" type="checkbox"/> | <input type="checkbox"/> Human research participants      |
| <input checked="" type="checkbox"/> | <input type="checkbox"/> Clinical data                    |

### Methods

| n/a                                 | Involvement in the study                           |
|-------------------------------------|----------------------------------------------------|
| <input checked="" type="checkbox"/> | <input type="checkbox"/> ChIP-seq                  |
| <input type="checkbox"/>            | <input checked="" type="checkbox"/> Flow cytometry |
| <input checked="" type="checkbox"/> | <input type="checkbox"/> MRI-based neuroimaging    |

## Antibodies

|                 |                                                                                                                                                                                                                                                             |
|-----------------|-------------------------------------------------------------------------------------------------------------------------------------------------------------------------------------------------------------------------------------------------------------|
| Antibodies used | We used two primary antibodies: mouse monoclonal anti-A $\beta$ antibody (6E10, SIG-39320, Covance) and mouse monoclonal anti-GAPDH antibody (sc-365062, Santa Cruz Biotechnology). The secondary antibody is anti-mouse immunoglobulins-HRP (P0447, Dako). |
| Validation      | The antibody dilution 1:2000 was used for both primary antibodies.                                                                                                                                                                                          |

## Eukaryotic cell lines

Policy information about [cell lines](#)

|                                                                      |                                                                                                     |
|----------------------------------------------------------------------|-----------------------------------------------------------------------------------------------------|
| Cell line source(s)                                                  | Yeast <i>Saccharomyces cerevisiae</i>                                                               |
| Authentication                                                       | BY4741, BY4742, CEN.PK.113.11C                                                                      |
| Mycoplasma contamination                                             | No contamination                                                                                    |
| Commonly misidentified lines<br>(See <a href="#">ICLAC</a> register) | Name any commonly misidentified cell lines used in the study and provide a rationale for their use. |

## Flow Cytometry

### Plots

Confirm that:

- The axis labels state the marker and fluorochrome used (e.g. CD4-FITC).
- The axis scales are clearly visible. Include numbers along axes only for bottom left plot of group (a 'group' is an analysis of identical markers).
- All plots are contour plots with outliers or pseudocolor plots.
- A numerical value for number of cells or percentage (with statistics) is provided.

### Methodology

Sample preparation

Experiments were performed in biological triplicates. Viability was measured by propidium iodide (PI, Thermo Fisher Scientific) staining. 0.5 OD<sub>600nm</sub> of cells were stained with 0.5 µg/ml of PI in the dark at room temperature for 20 min.

Instrument

Guava easyCyte HT system

Software

FlowJo

Cell population abundance

5000 cells were analyzed for each sample.

Gating strategy

PI is a vital stain which stains dead cells in red color. Two populations could be distinguished based on RFP fluorescence intensity. Positively stained cells fall within the more fluorescent population (mean fluorescence 5–100 times higher).

- Tick this box to confirm that a figure exemplifying the gating strategy is provided in the Supplementary Information.
